# Supplementary material for: Small-molecule-mediated OGG1 inhibition attenuates pulmonary inflammation and lung fibrosis
Source: Research Square preprint supplement (doi:10.21203/rs.3.rs-990197/v1), 2021-10-21
Supplement: Supplementary file 1 [file 4c62a87dd212d1cbbc742b18.docx]

**Small-molecule-mediated OGG1 inhibition attenuates pulmonary inflammation and lung fibrosis**

L. Tanner1*, A.B. Single1, R.K.V Bhongir1, M. Heusel2, T. Mohanty2, C.A.Q. Karlsson2, C-M. Clausson3, C.K. Andersson4, R. M. Oommen5, J.S. [Erjefält](javascript:;)3, J. [Malmström](https://www.nature.com/articles/s41467-019-09040-0#auth-Johan-Malmstr_m)2, O. Wallner5, T. Helleday5,6,7, C. Kalderén5, 6, A. Egesten1

1Respiratory Medicine & Allergology, Department of Clinical Sciences Lund, Lund University and Skåne University Hospital, SE-221 84 Lund, Sweden.

2Division of Infection Medicine, Department of Clinical Sciences, Lund University, SE-221 84 Lund, Sweden

3Division of Airway Inflammation, Department of Experimental Medical Sciences, Lund University, SE-221 84 Lund, Sweden

4Respiratory Cell Biology, Department of Experimental Medical Sciences Lund, Lund University, SE-221 84 Lund, Sweden

5Science for Life Laboratory, Department of Oncology-Pathology, Karolinska Institutet, SE-171 76 Stockholm, Sweden.

6Oxcia AB, Norrbackagatan 70C, SE-113 34 Stockholm

7 Weston Park Cancer Centre, Department of Oncology and Metabolism, University of Sheffield, Sheffield S10 2RX, UK.

*Corresponding author. Email: [lloyd.tanner@med.lu.se](mailto:lloyd.tanner@med.lu.se).

**Supplemental Figures**

**
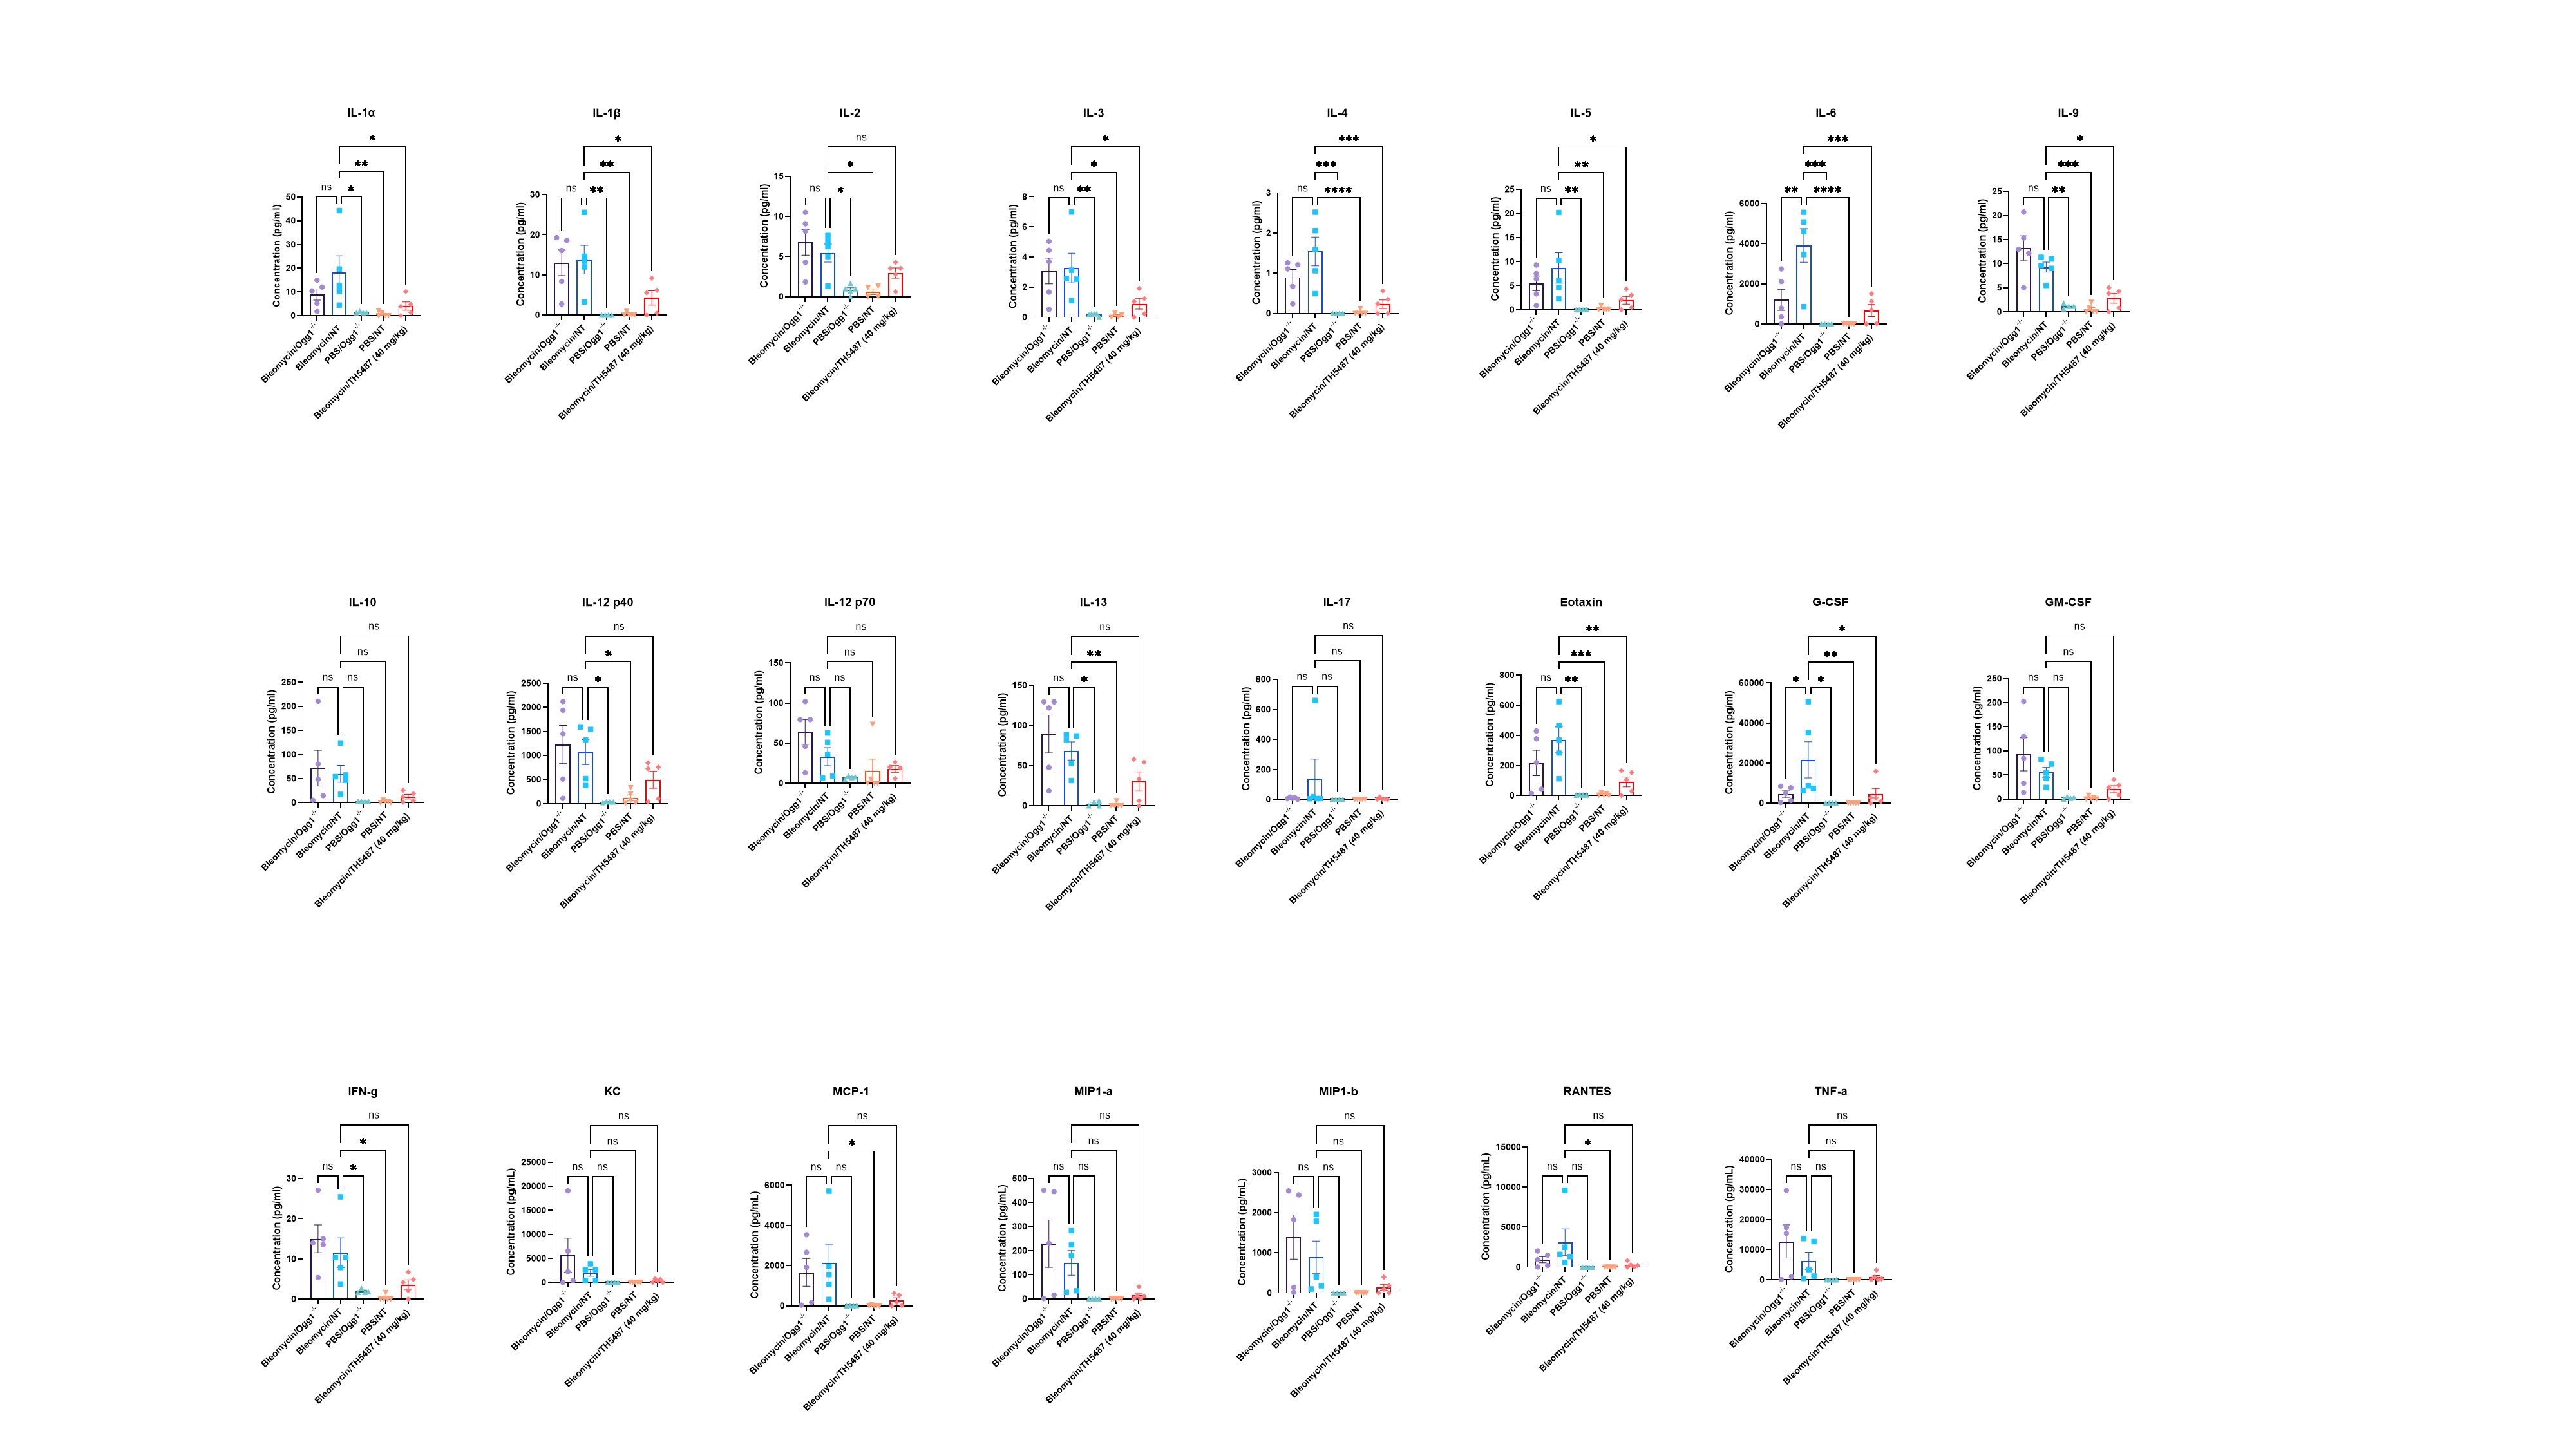
**

**Supplementary Figure 1: Murine BALF cytokine levels from siRNA experiments.** Cytokine values were compared to the vehicle/bleomycin group using a one-way ANOVA (**P<*0.05*; **P<*0.01*; ***P<*0.005*; *****P<*0.001).
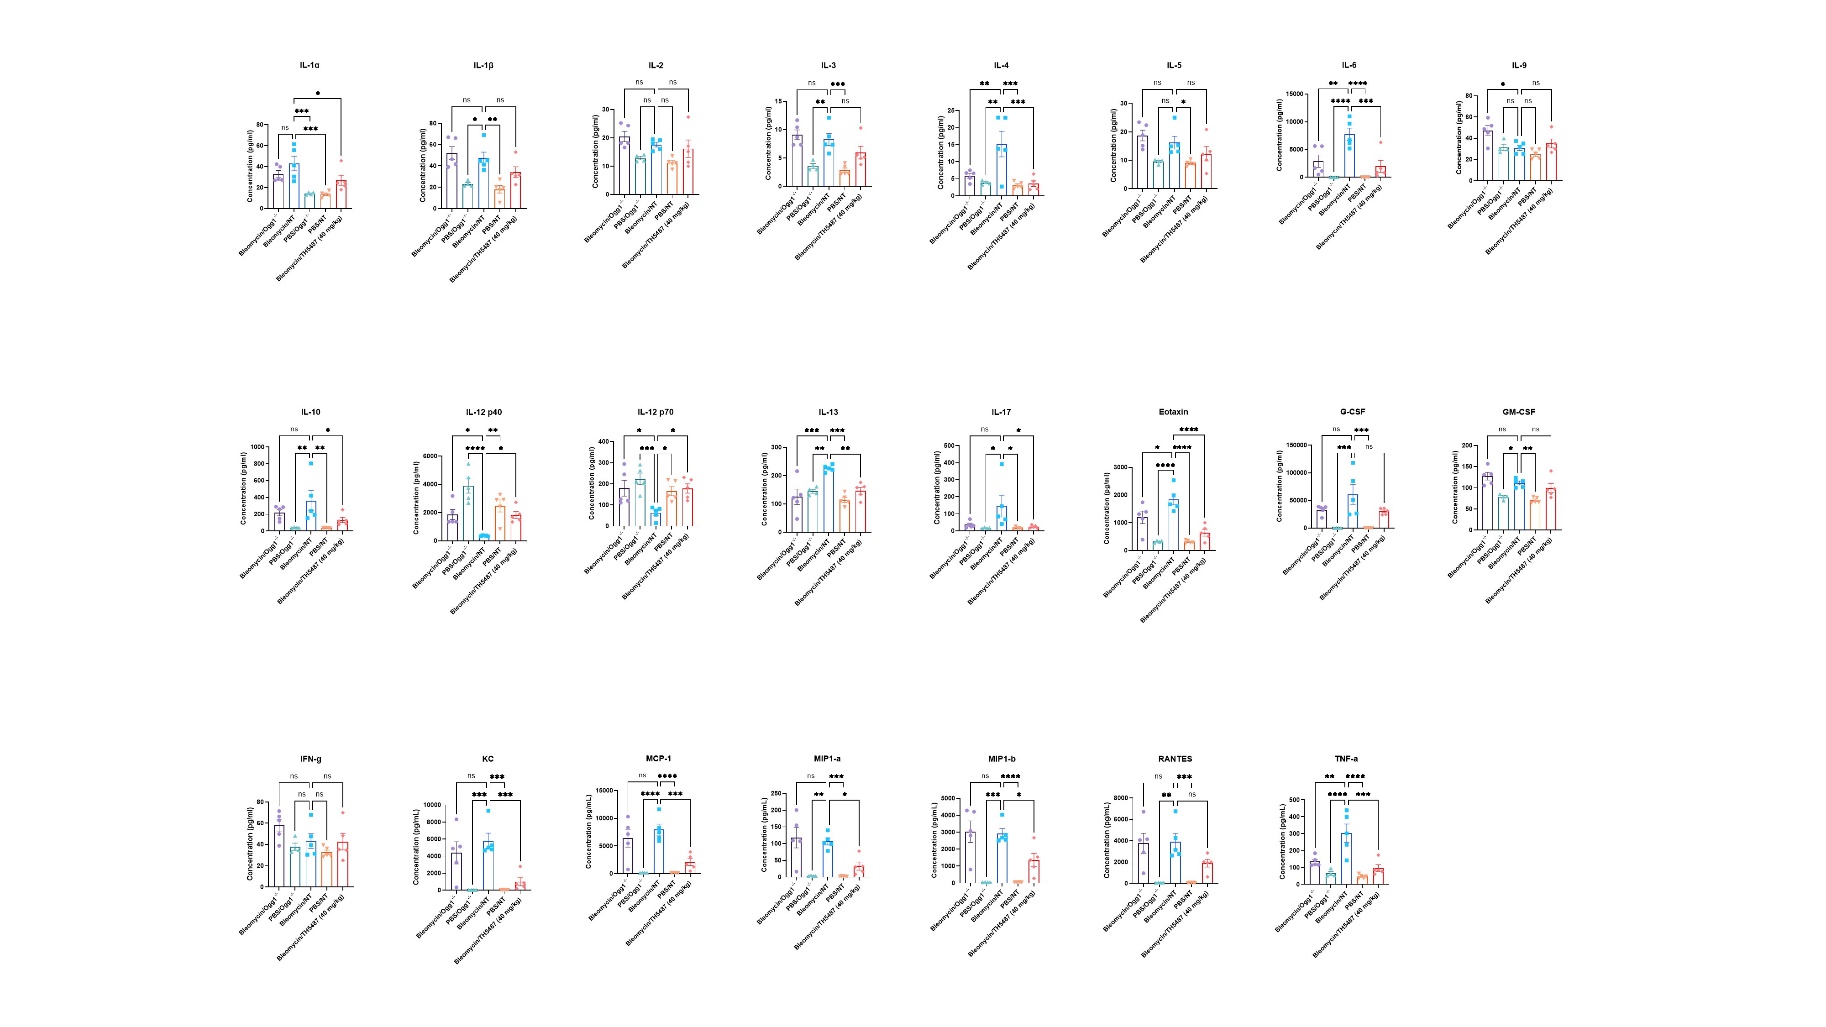
**Supplementary Figure 2: Murine plasma cytokine levels from siRNA experiments.** Cytokine values were compared to the vehicle/bleomycin group using a one-way ANOVA (**P<*0.05*; **P<*0.01*; ***P<*0.005*; *****P<*0.001).


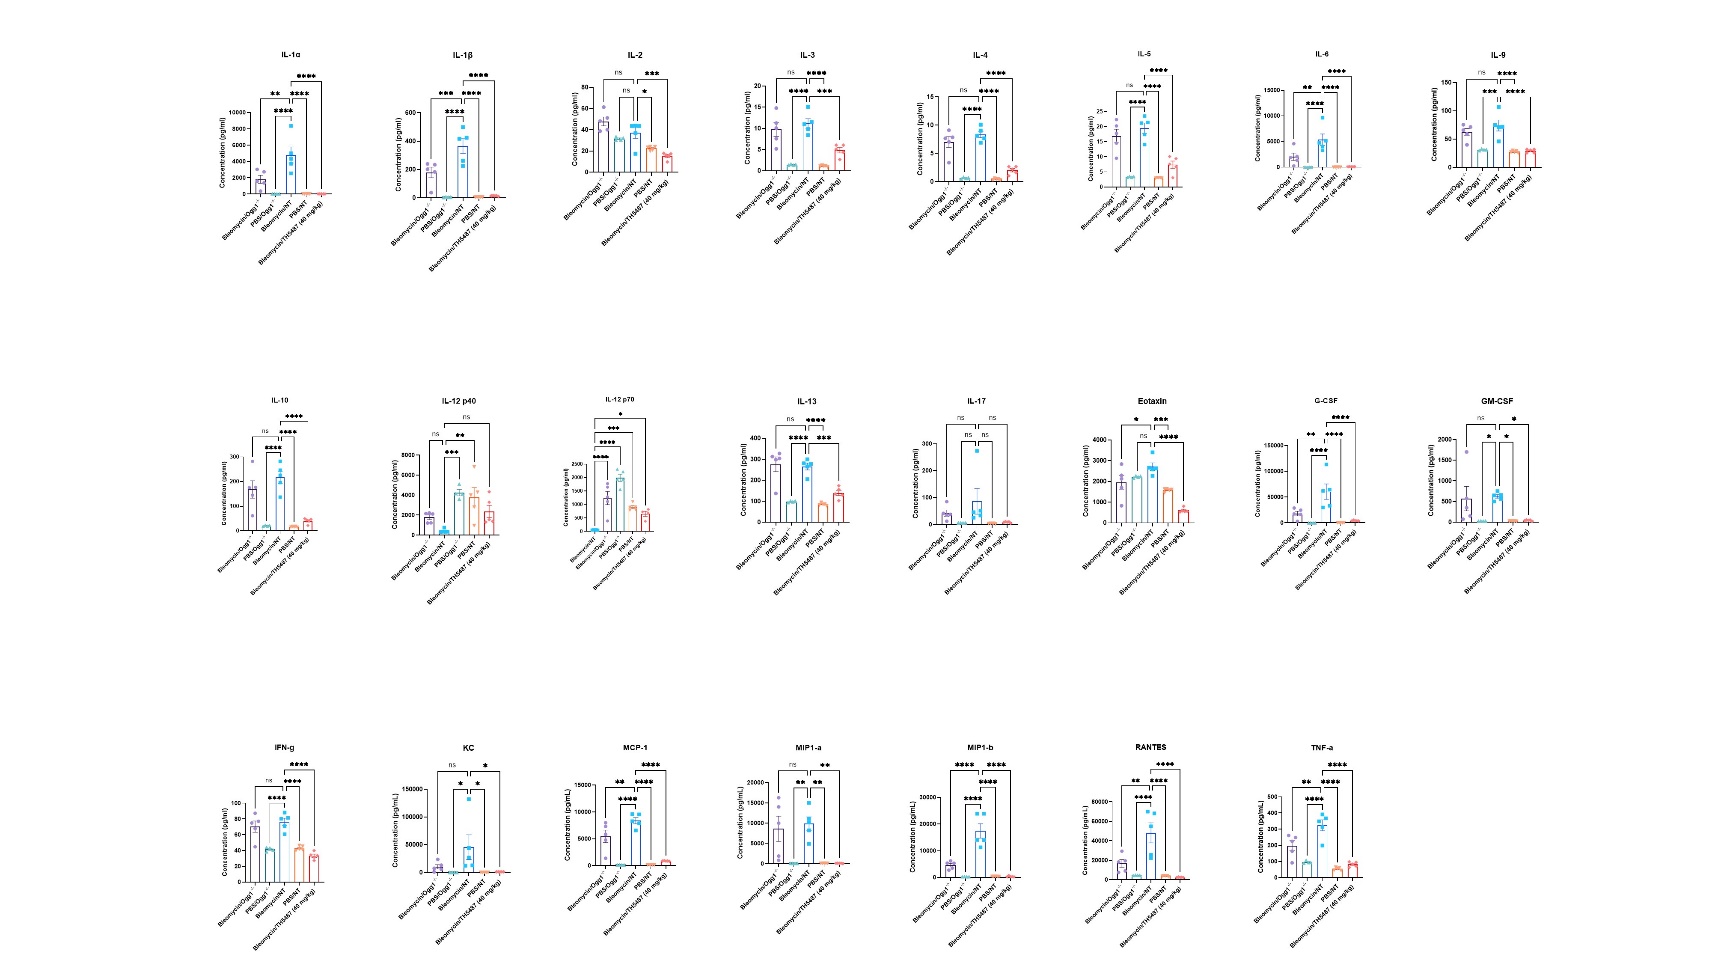


**Supplementary Figure 3: Murine lung homogenate cytokine levels from siRNA experiments.** Cytokine values were compared to the vehicle/bleomycin group using a one-way ANOVA (**P<*0.05*; **P<*0.01*; ***P<*0.005*; *****P<*0.001).

**
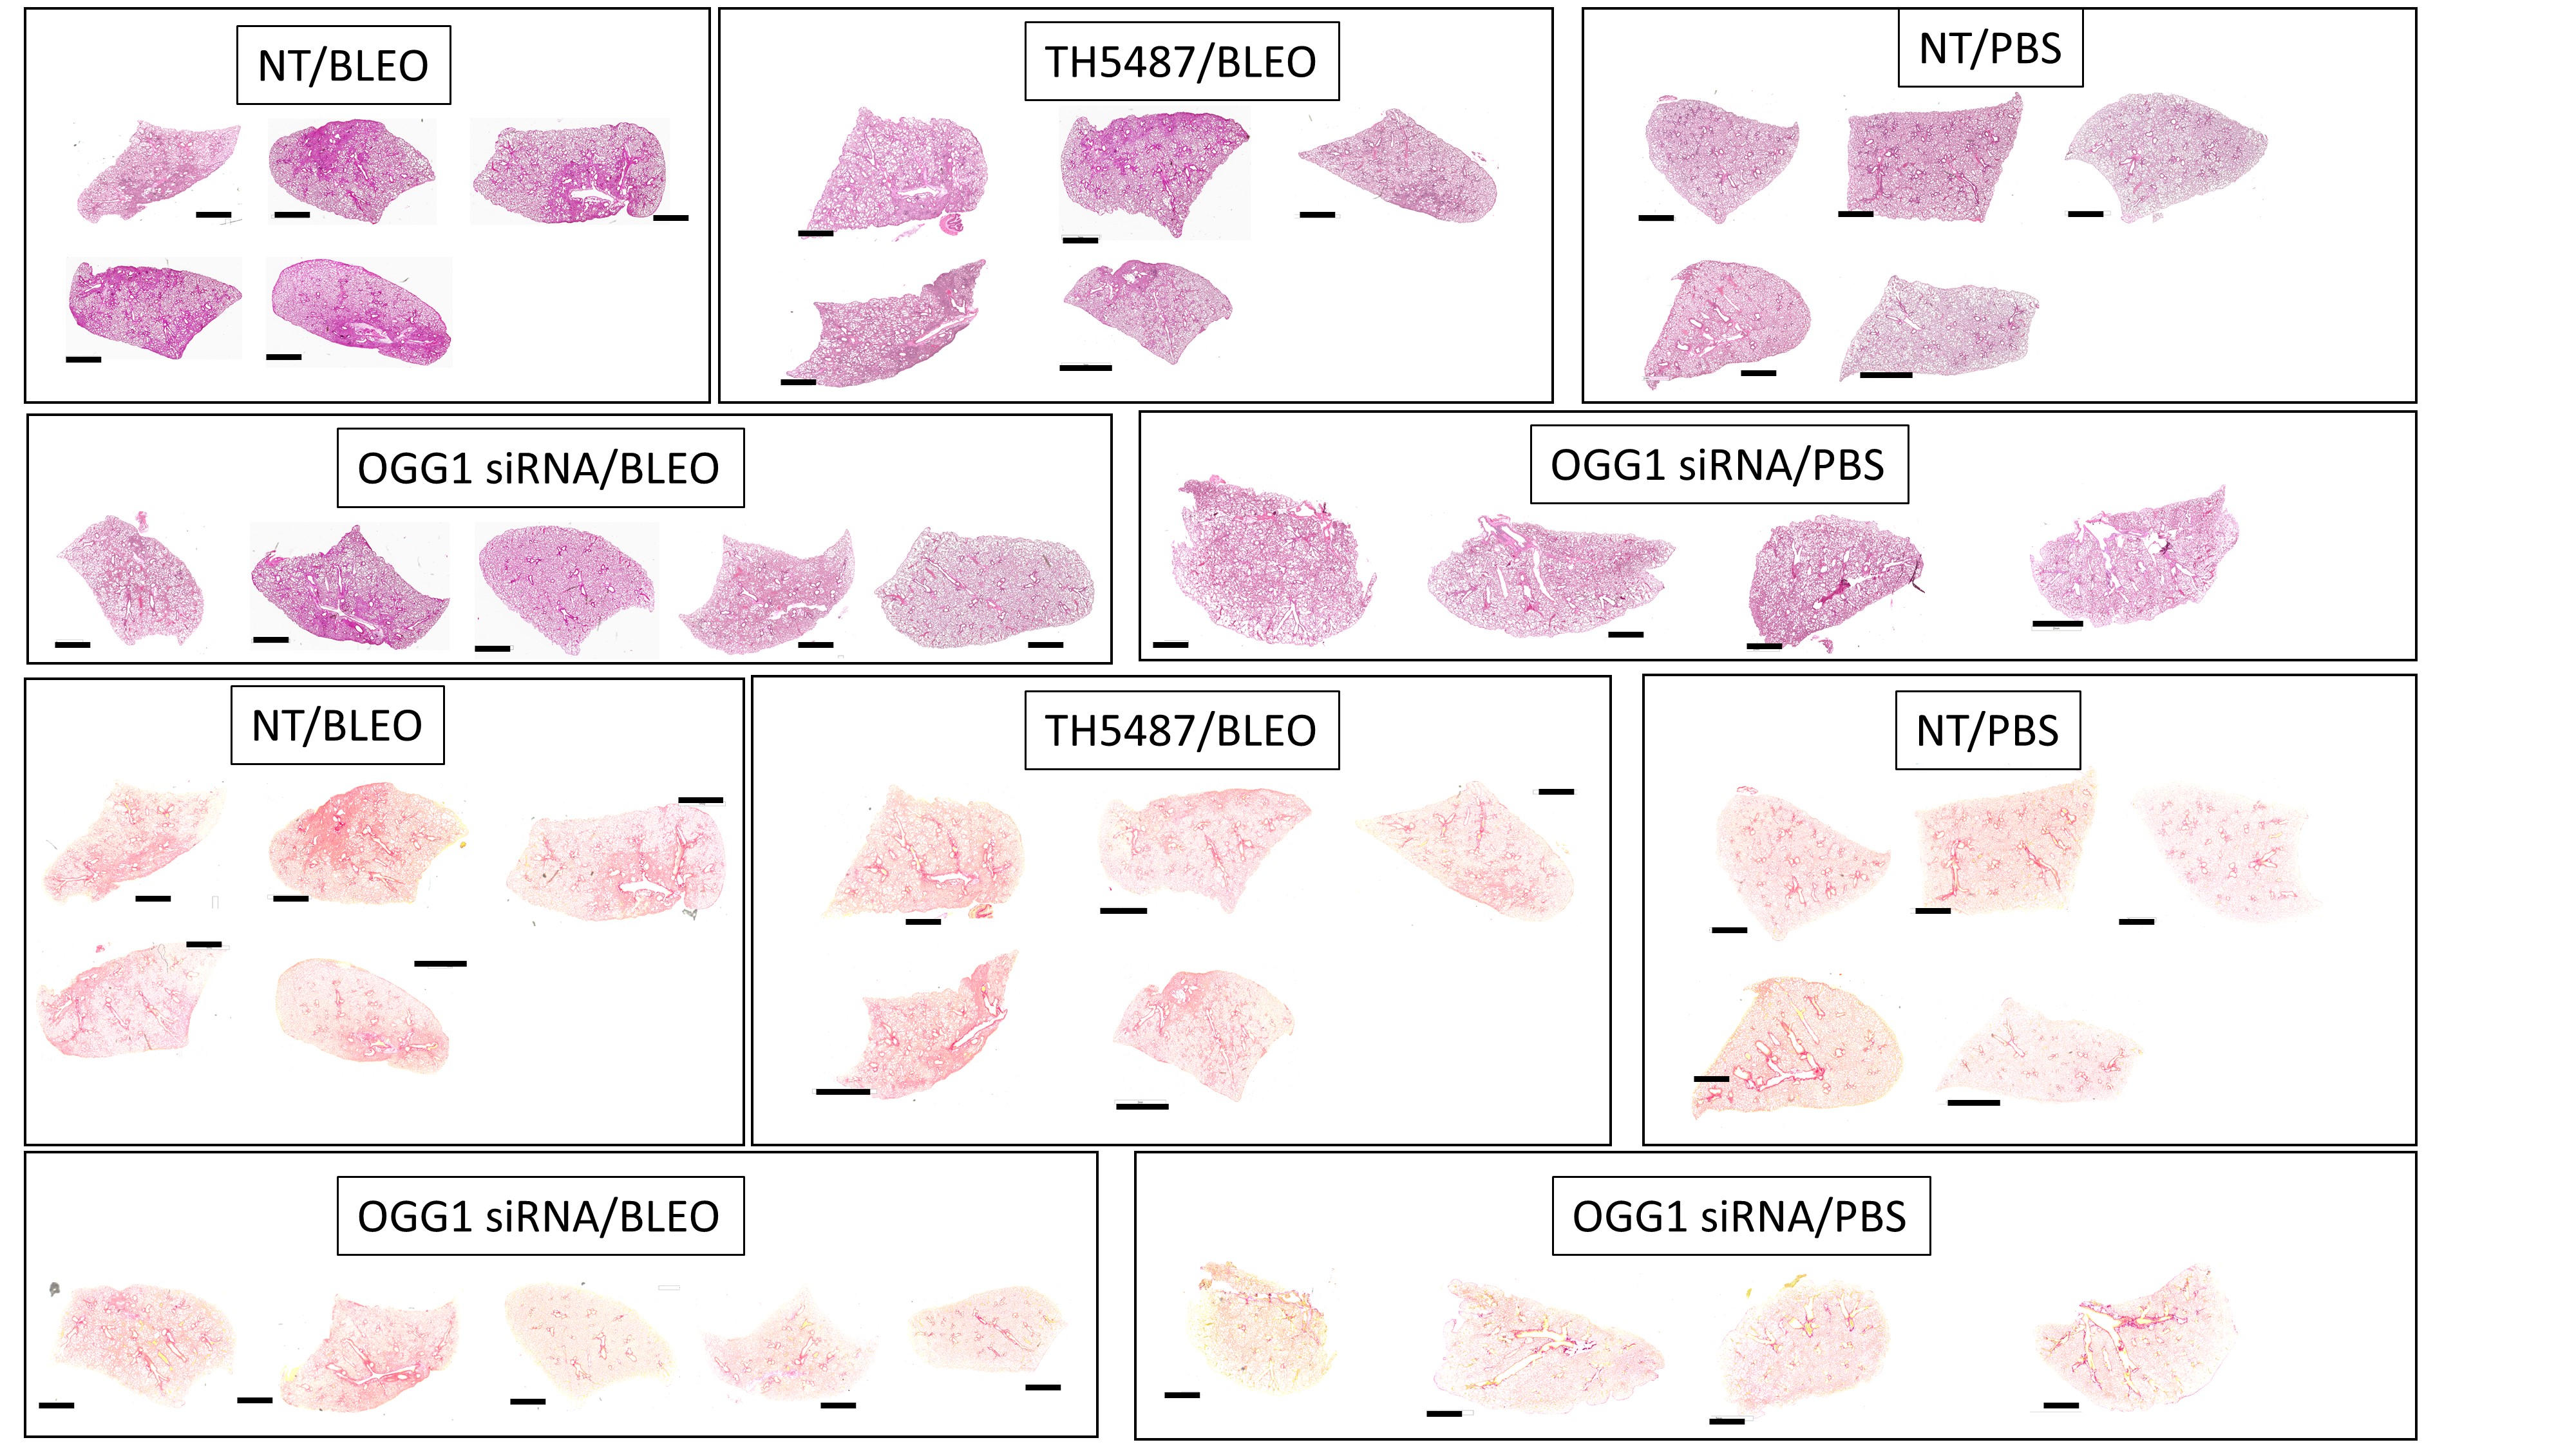
Supplementary Figure 4: Whole lung scans of murine lungs from siRNA experiments following H&E and picrosirius red staining (scale bar=2 mm).**

**
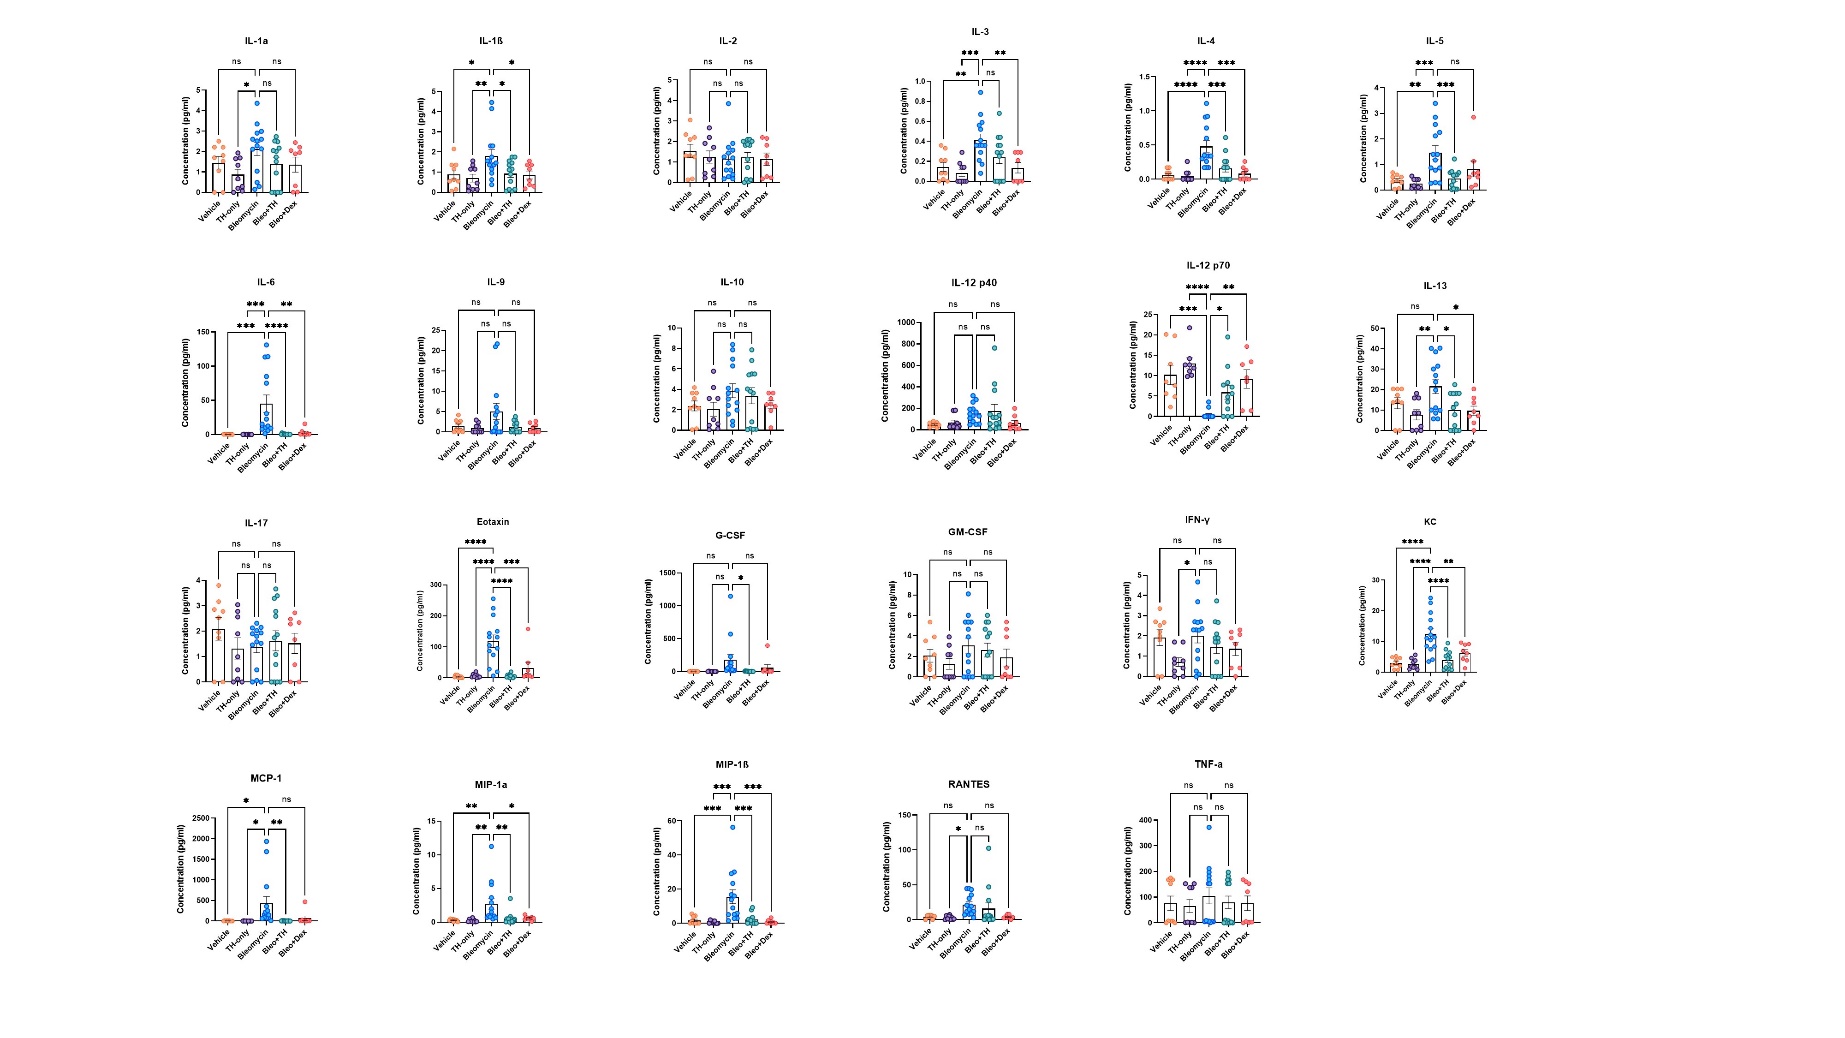
**

**Supplementary Figure 5: Murine BALF cytokine levels.** Cytokine values were compared to the vehicle/bleomycin group using a one-way ANOVA (**P<*0.05*; **P<*0.01*; ***P<*0.005*; *****P<*0.001).


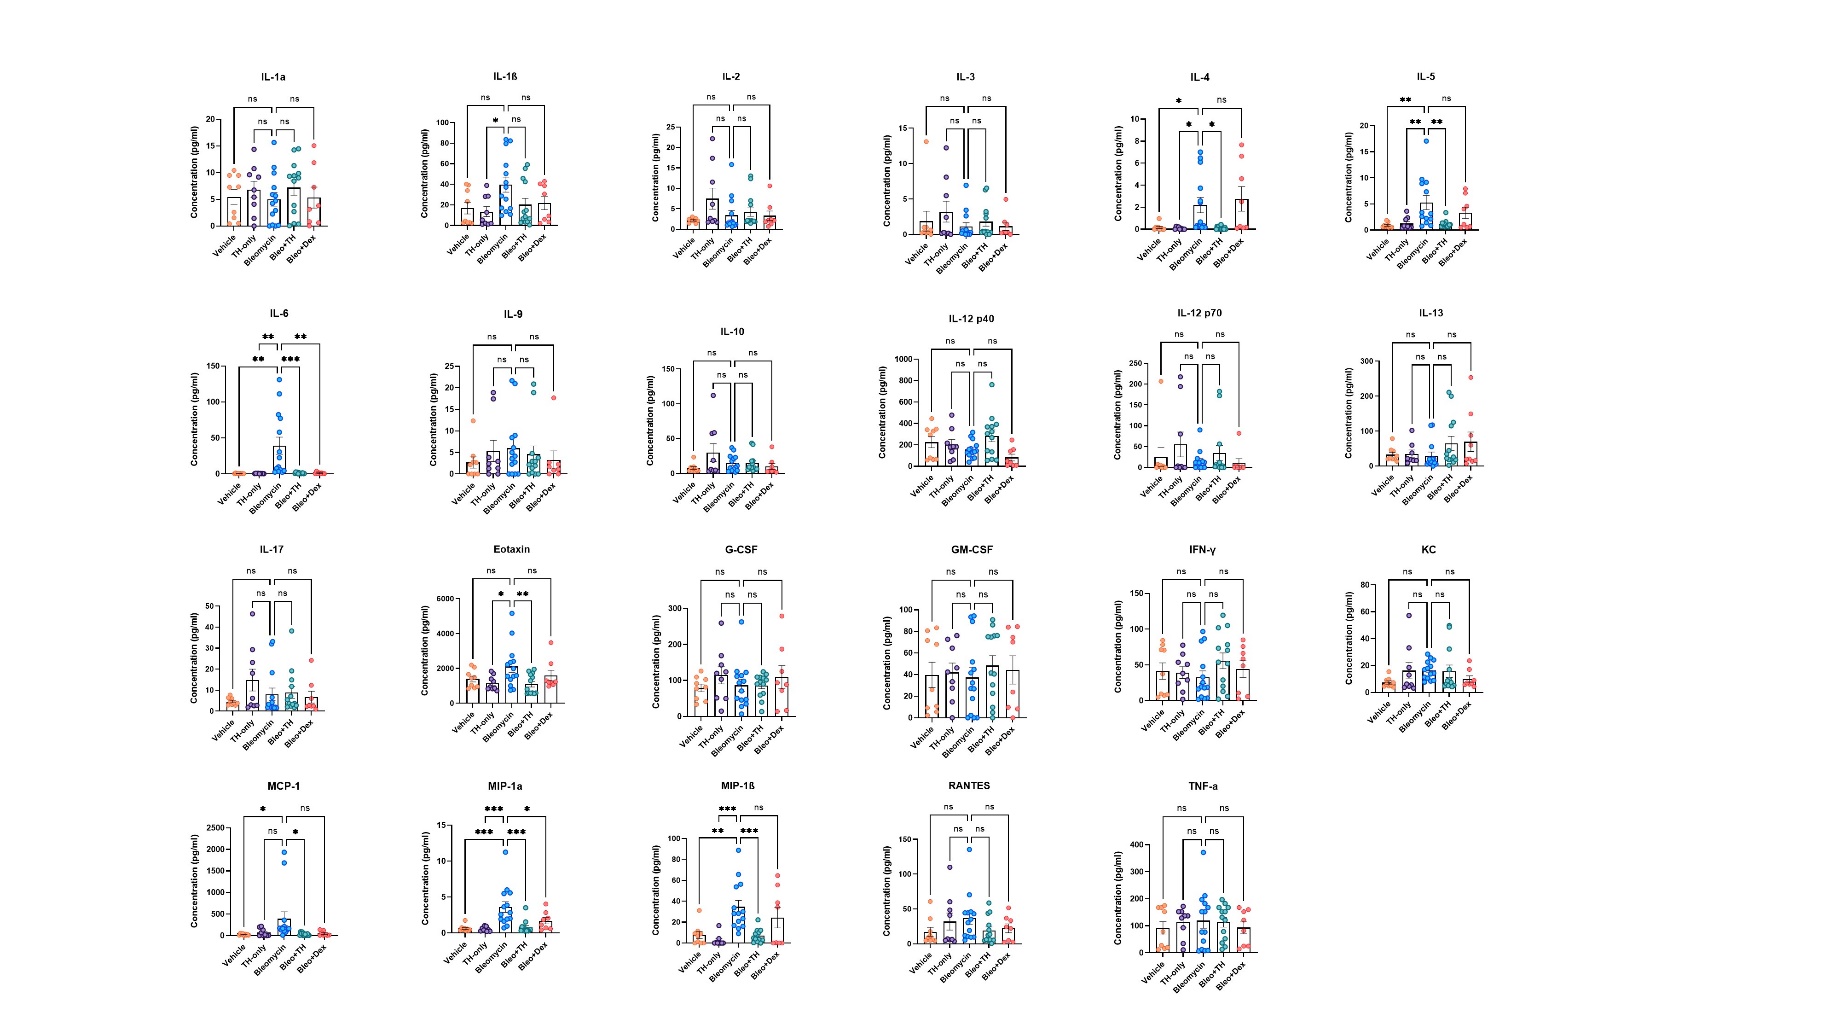


**Supplementary Figure 6: Murine plasma cytokine levels.** Cytokine values were compared to the vehicle/bleomycin group using a one-way ANOVA (**P<*0.05*; **P<*0.01*; ***P<*0.005*; *****P<*0.001).**
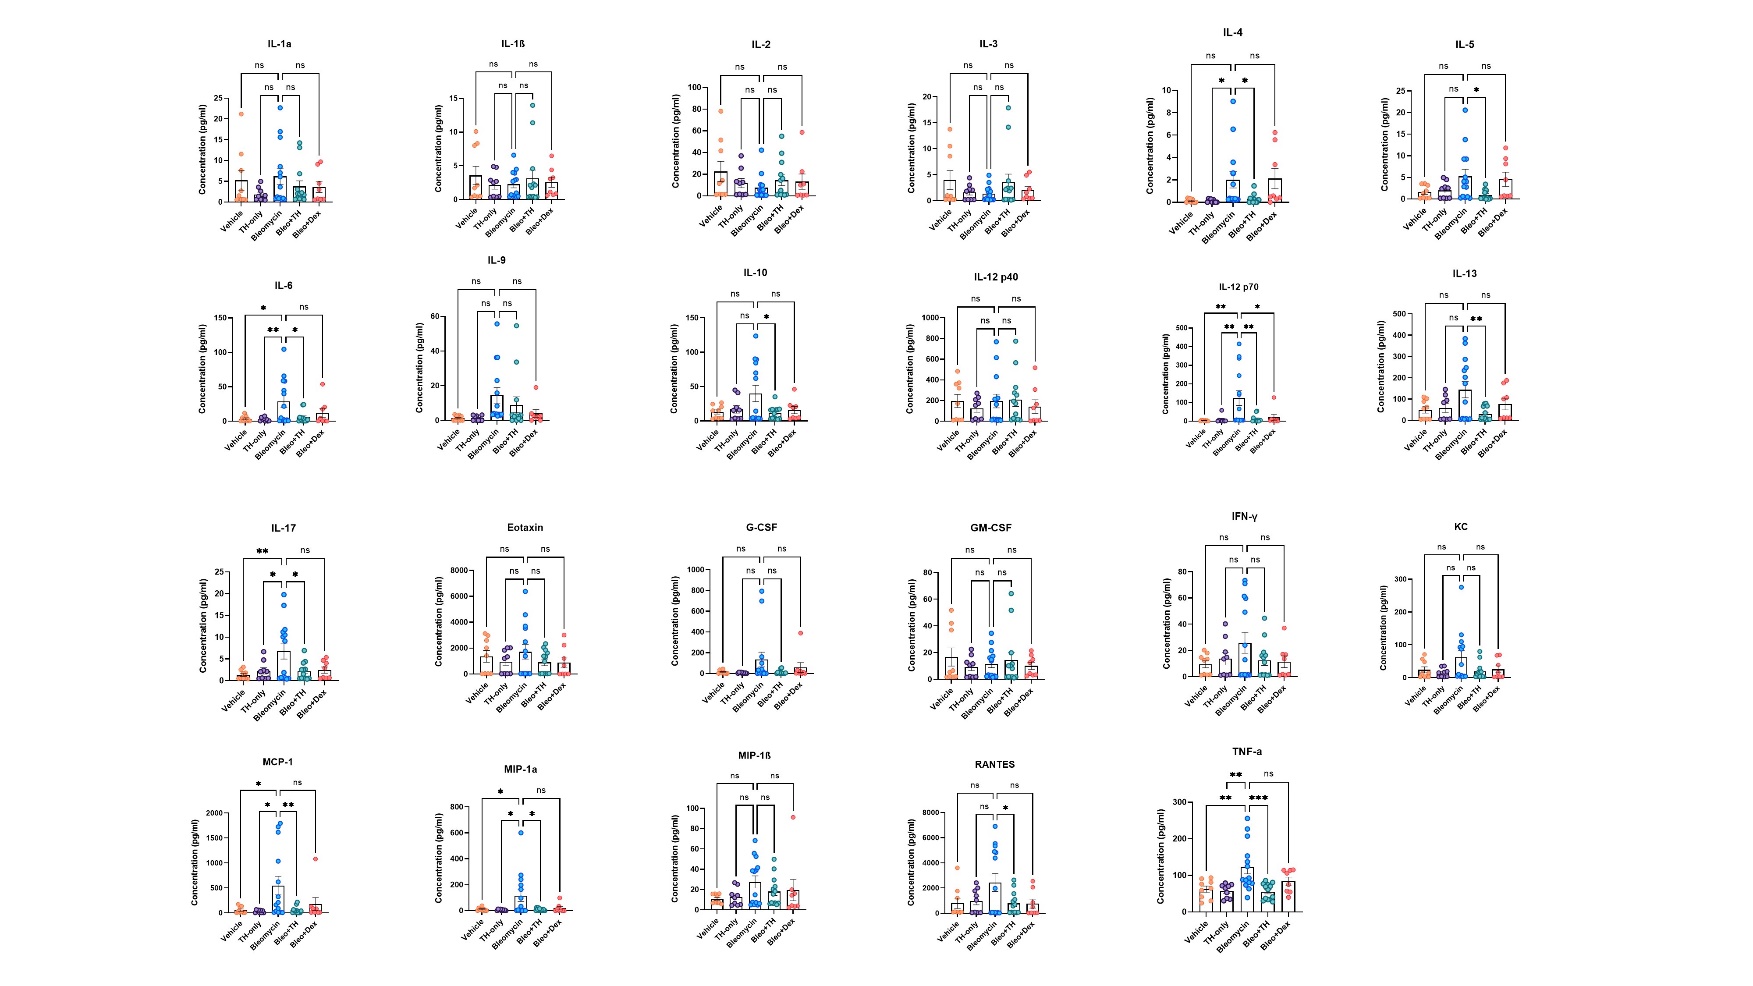
**

**Supplementary Figure 7: Murine lung homogenate cytokine levels.** Cytokine values were compared to the vehicle/bleomycin group using a one-way ANOVA (**P<*0.05*; **P<*0.01*; ***P<*0.005*; *****P<*0.001).

**
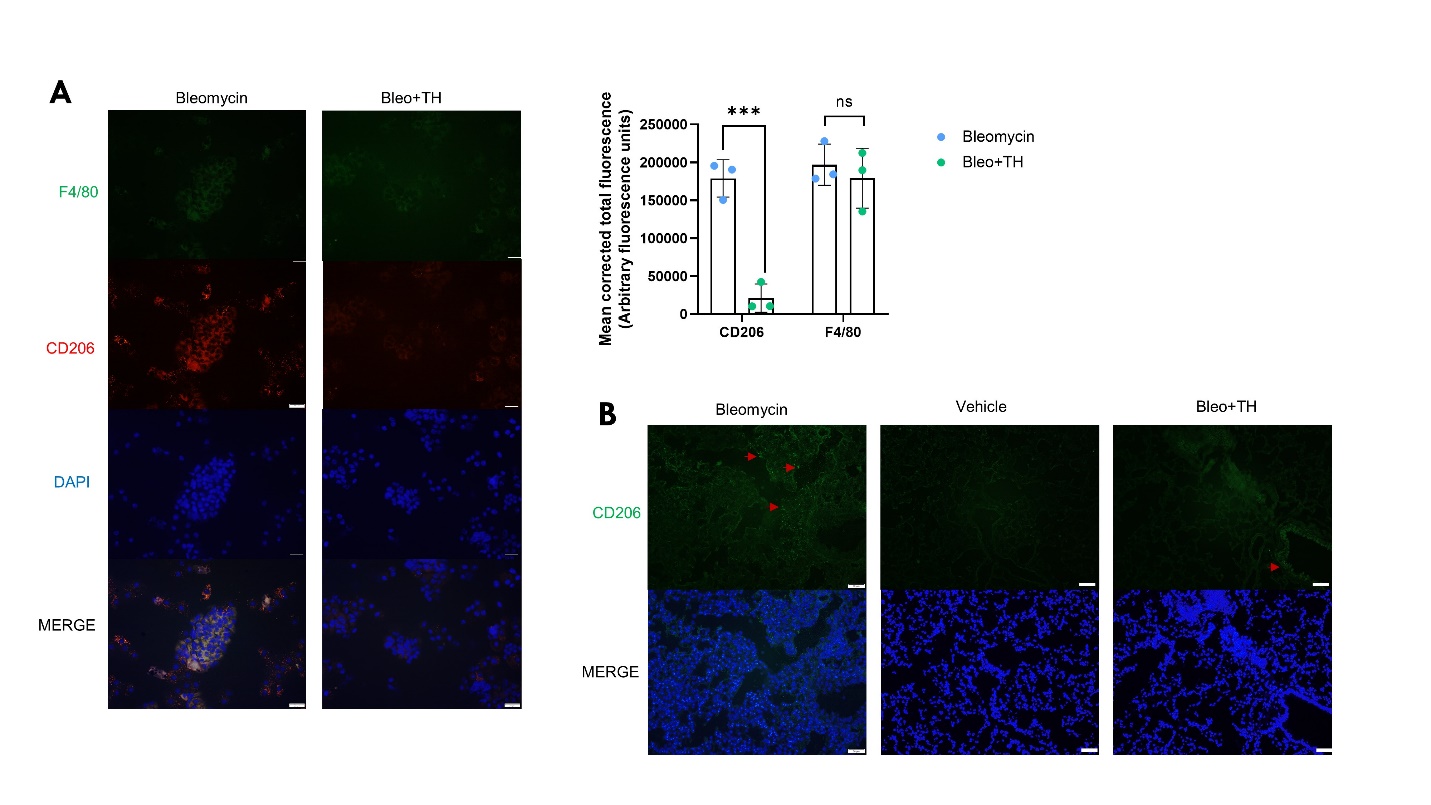
**

**Supplementary Figure 8: Macrophage staining in (A) BALF and (B) lung sections.** F4/80 and CD206 immunofluorescence staining, with quantification inset.


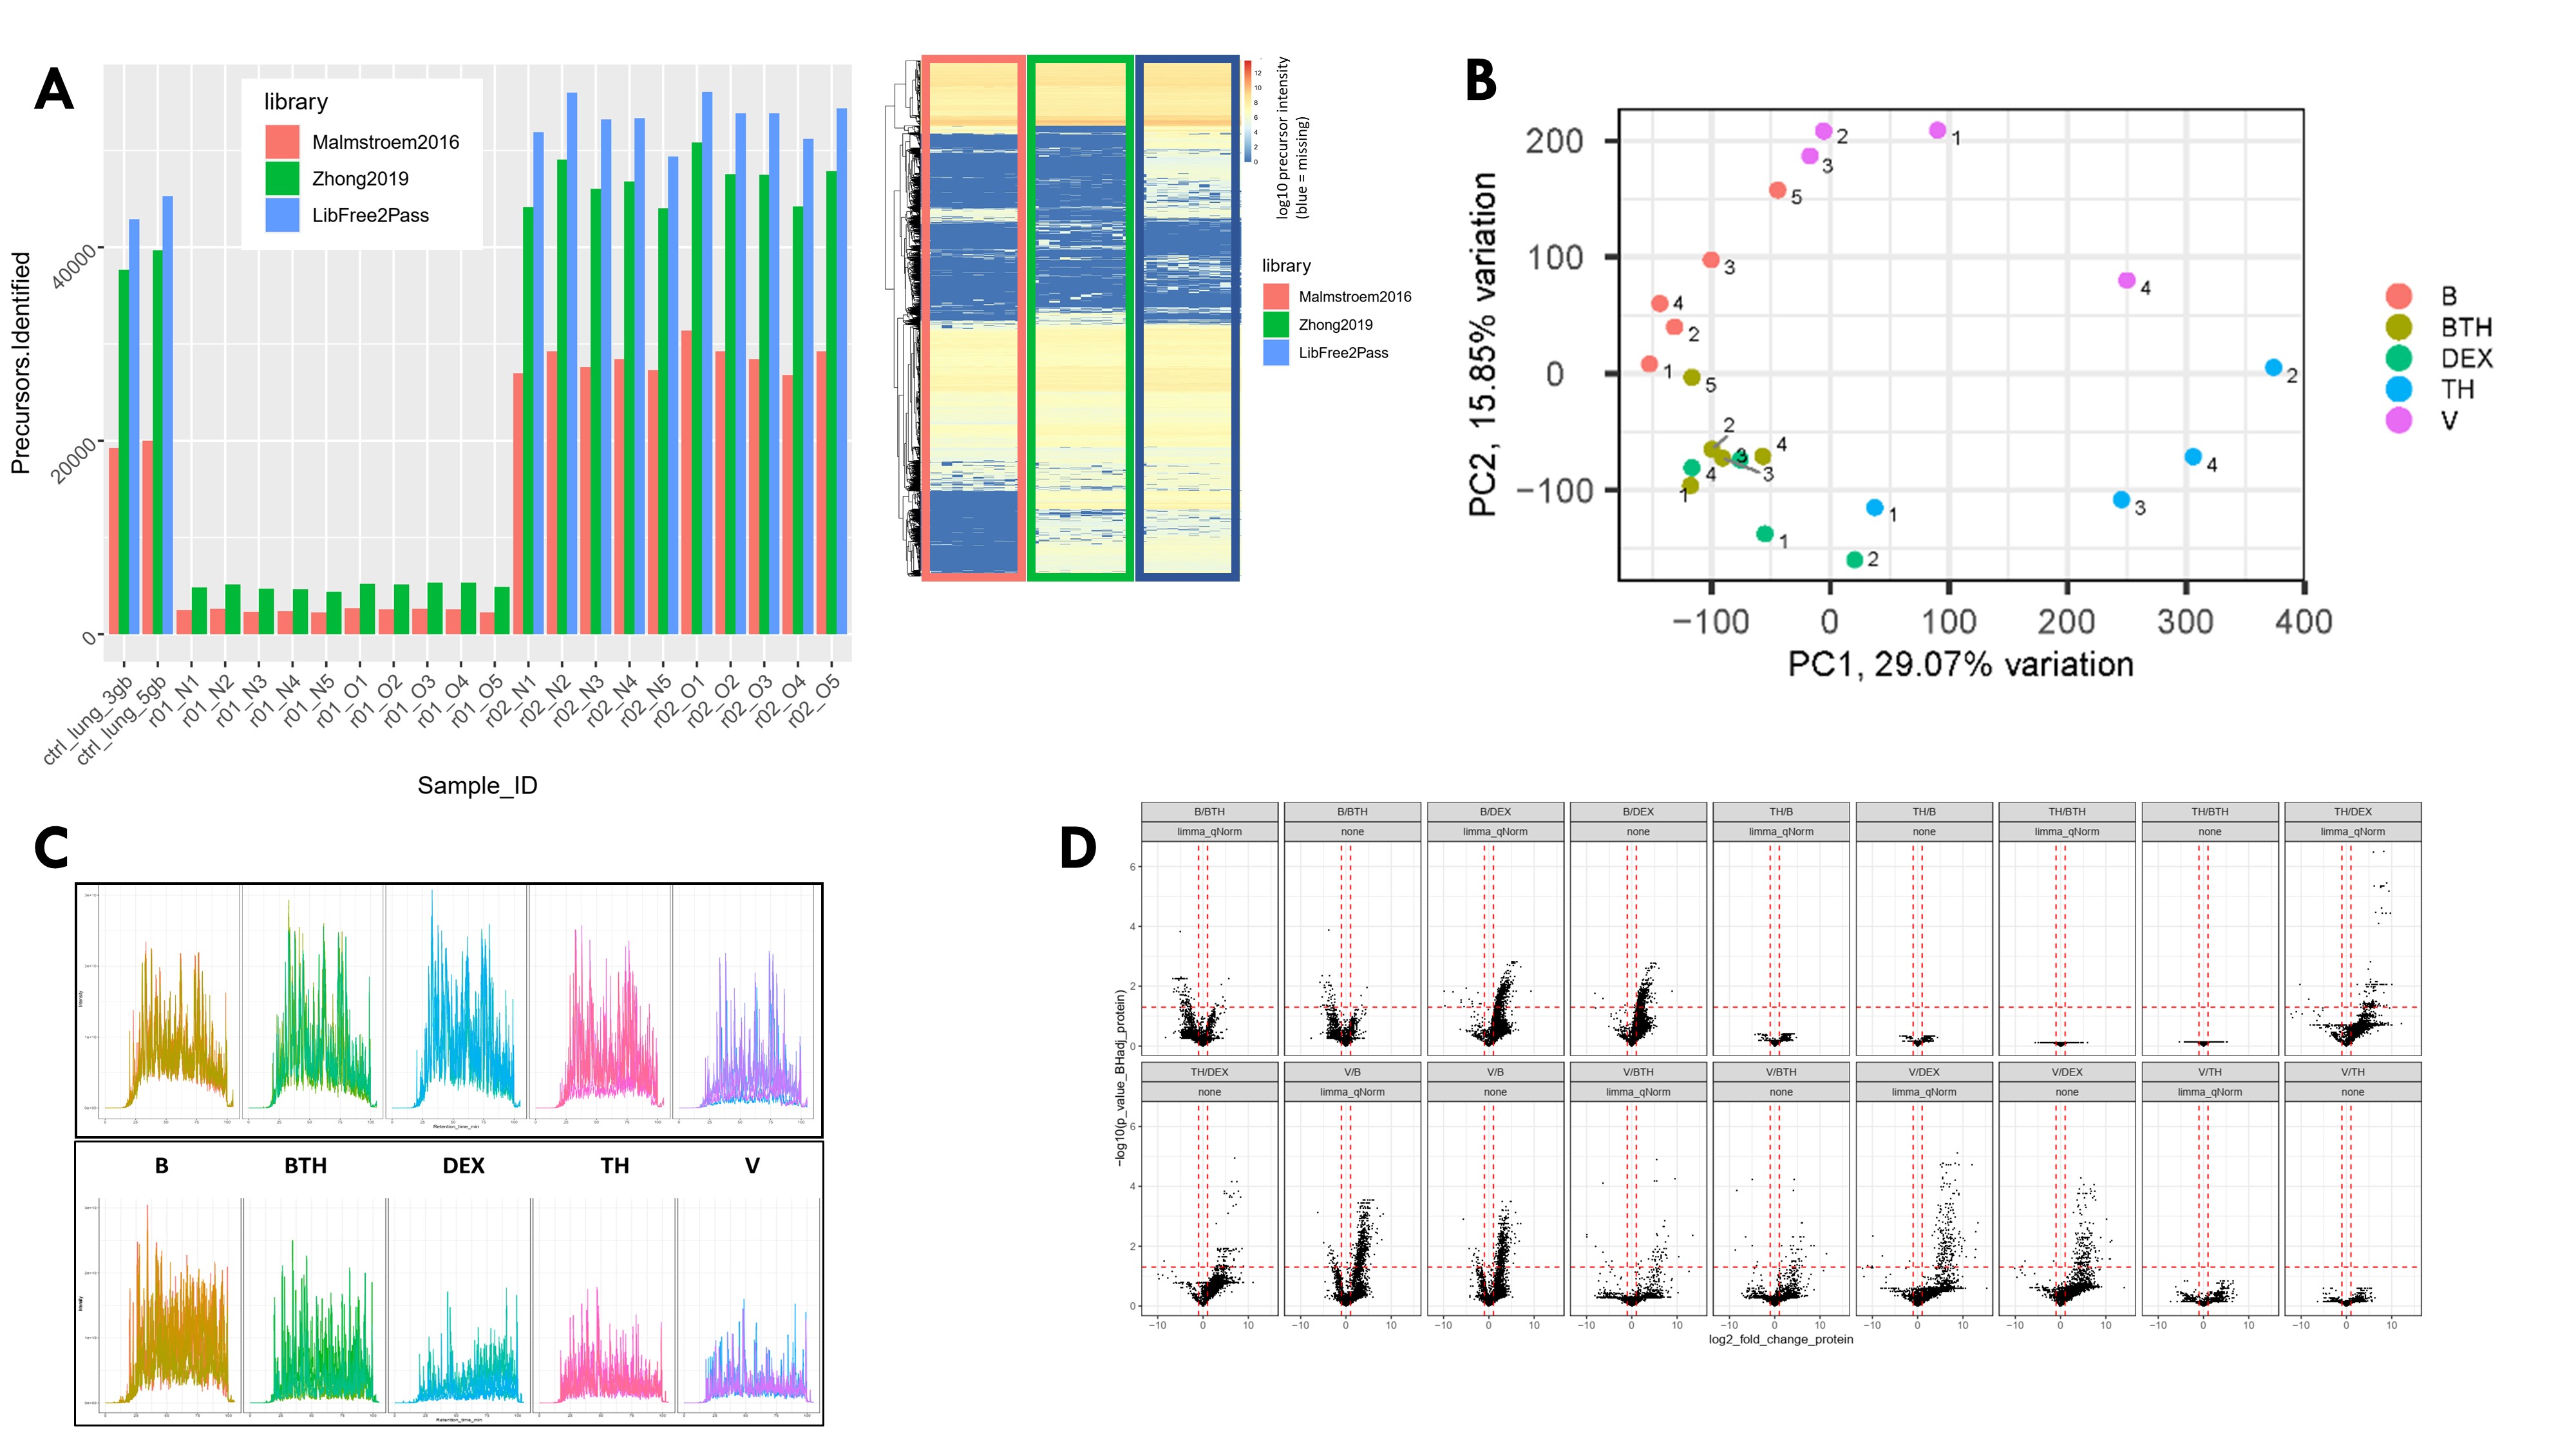


**Supplementary Figure 9: Proteomic DIA analysis.** (A) Increased precursor identifications where found using LibFree2Pass methodology in this study compared with prior-knowledge-based spectral library approaches (B) PCA plot showing treatment condition groupings. (C) Representative chromatograms, (D) Volcano plot displaying condition comparisons in the lung samples analyzed.


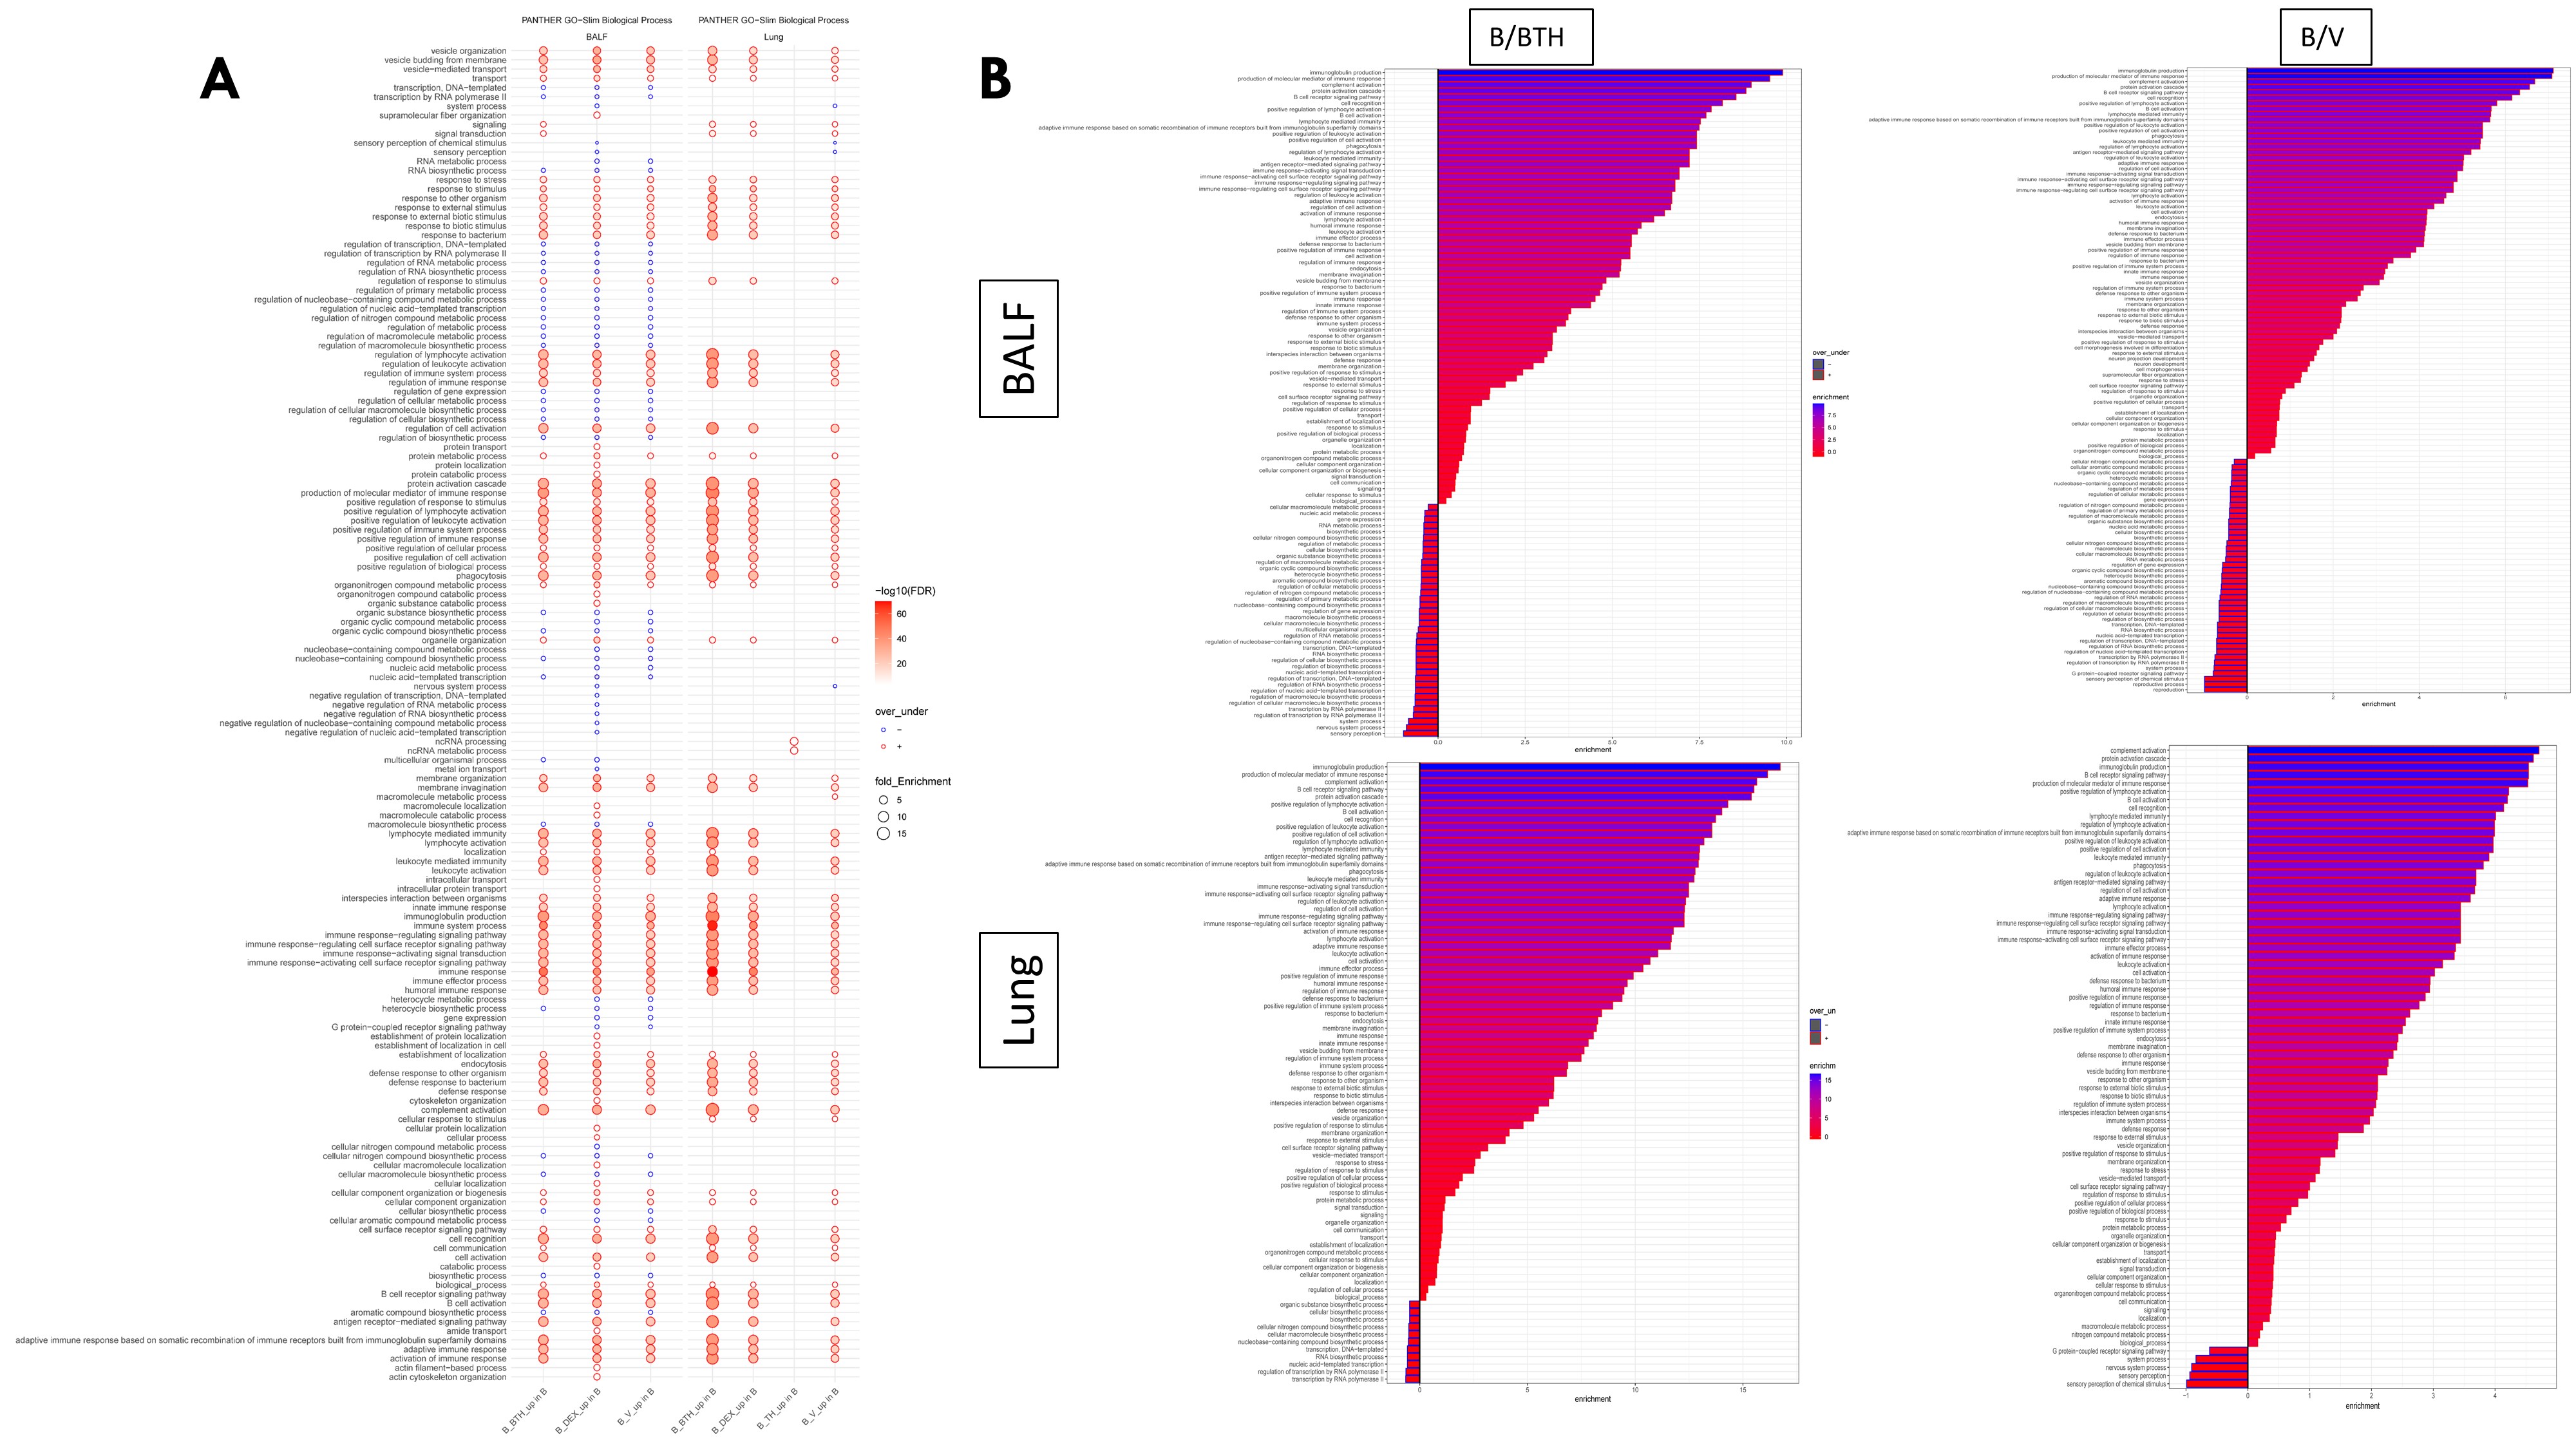


**Supplementary Figure 10: PANTHER gene ontology (GO) biological process enrichment analysis from BALF and lung homogenate protein list IDs.**

**
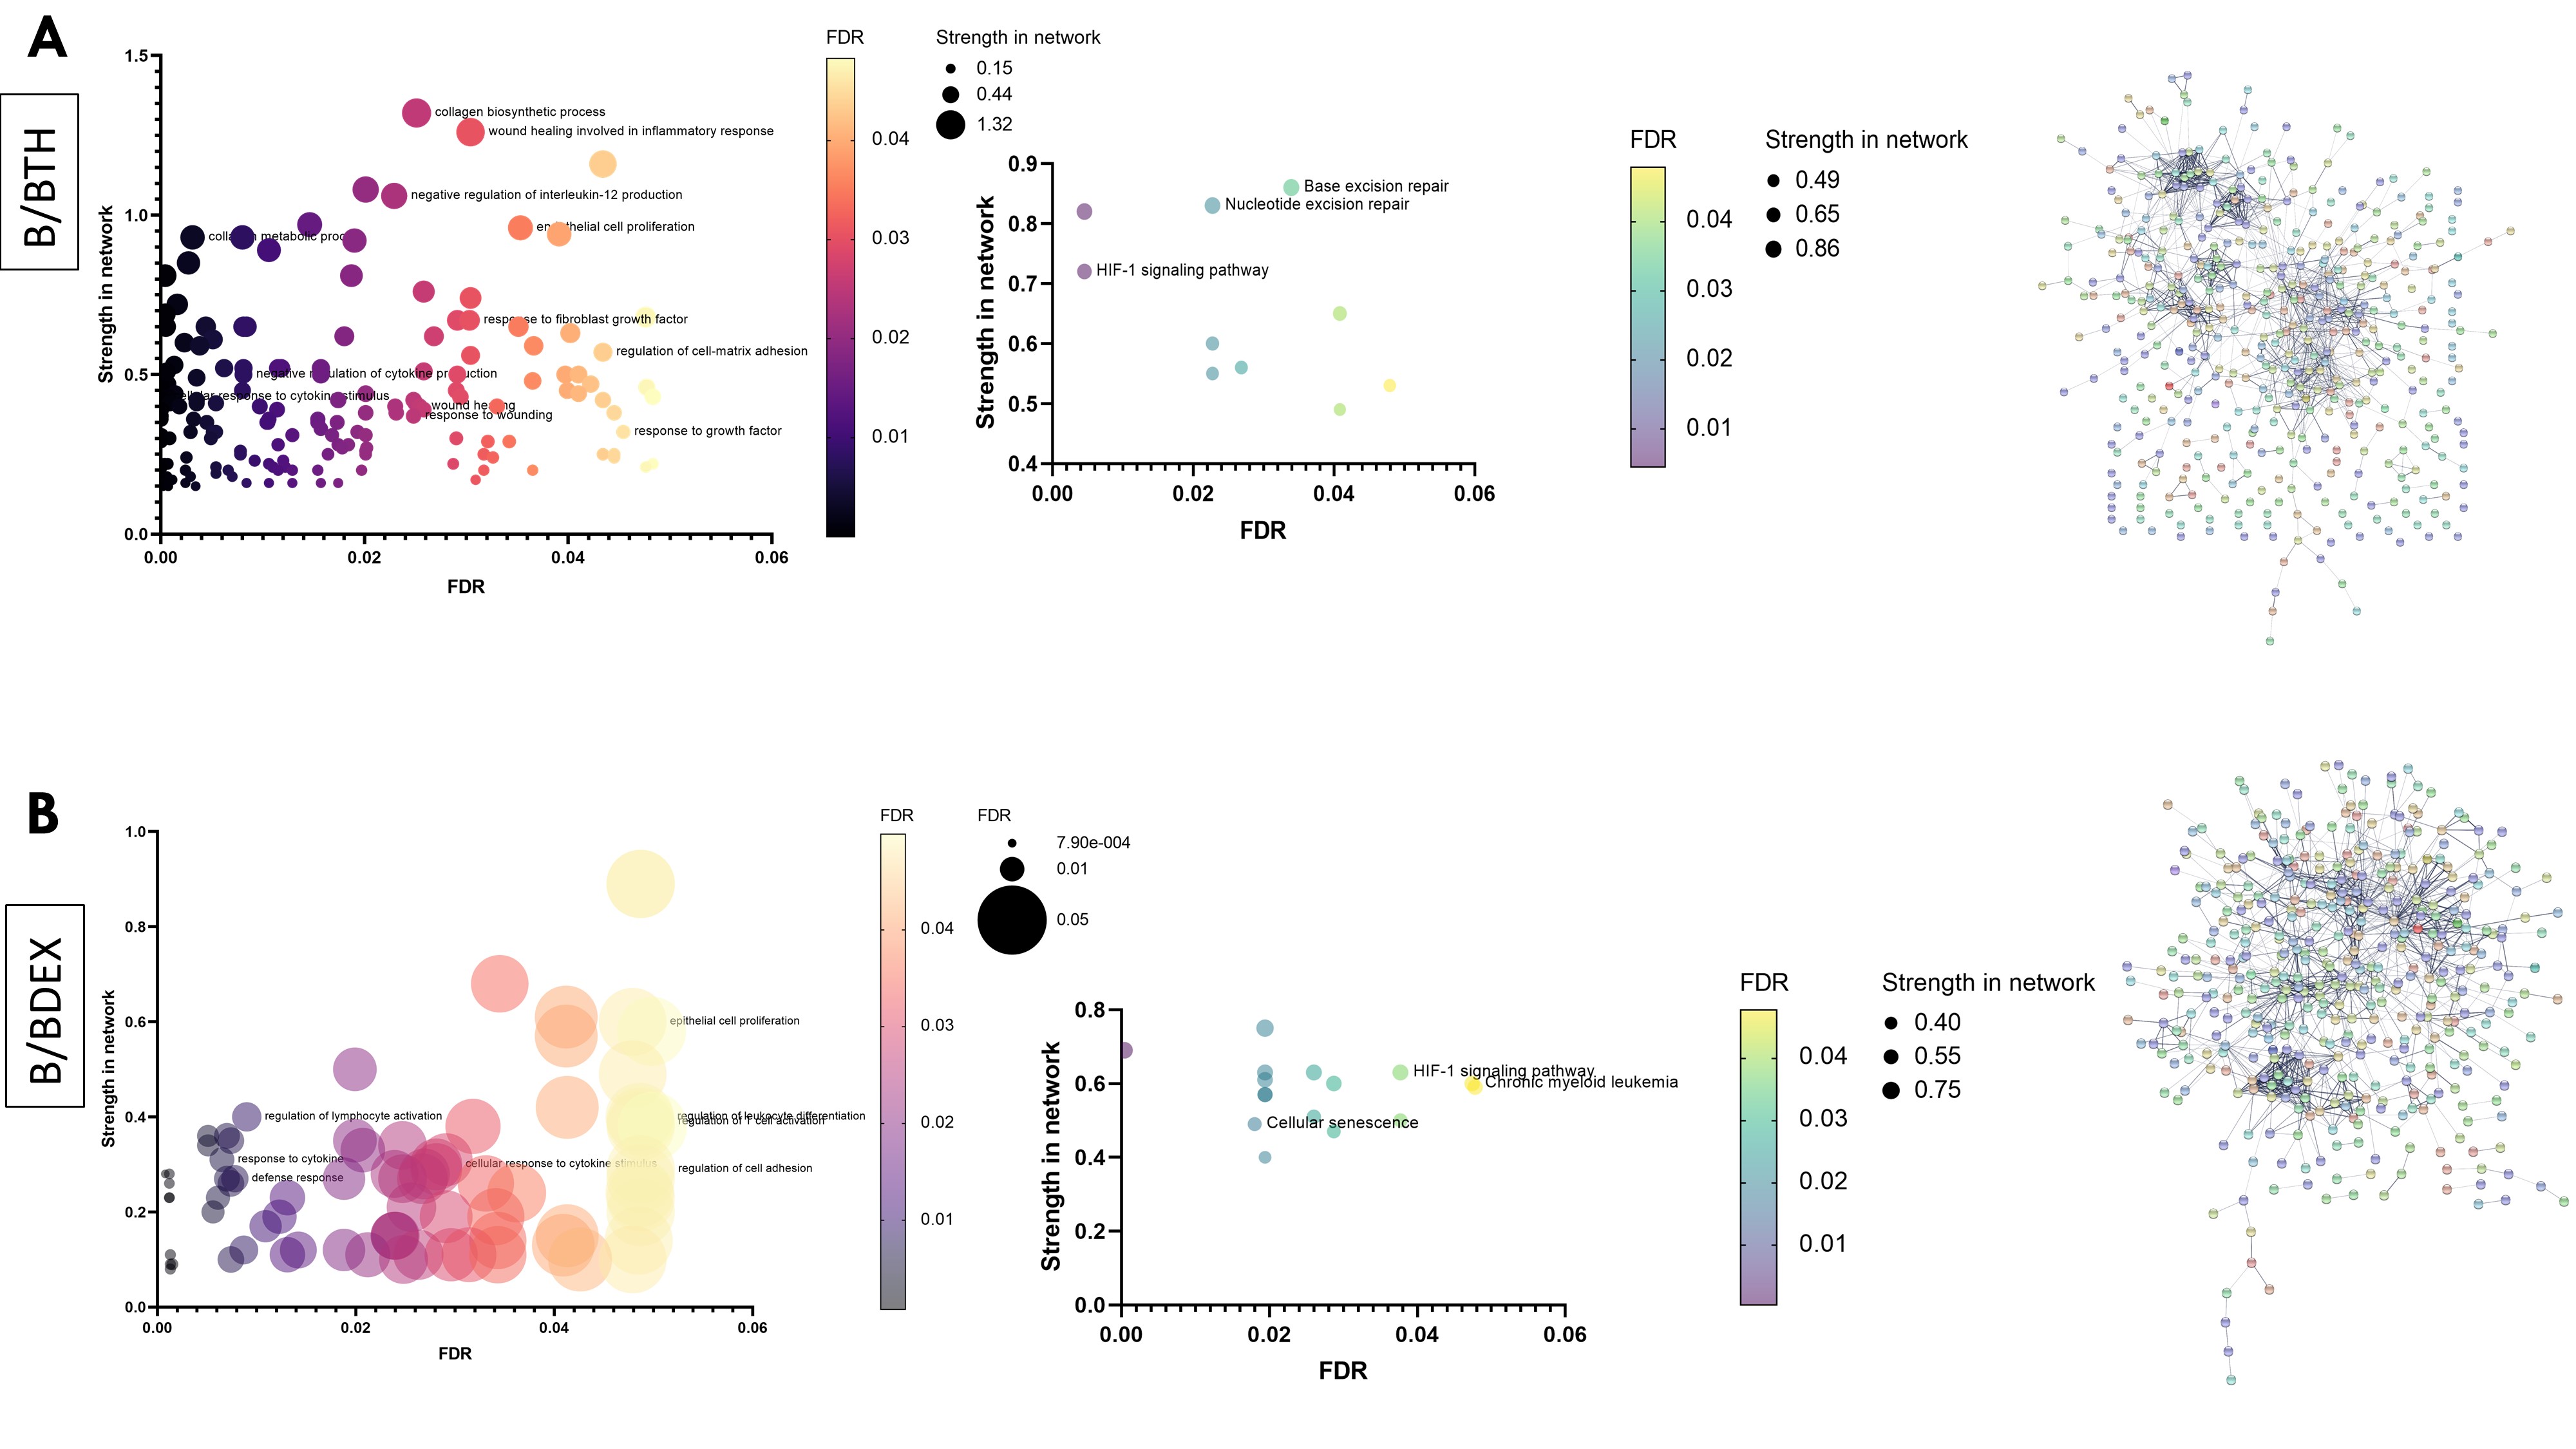
**

**Supplementary Figure 11: STRINGDB GO terms from lung homogenate samples.** (A) Bleomycin/Bleo/TH5487, (B) Bleomycin/dexamethasone treatment conditions; false discovery rate (FDR).


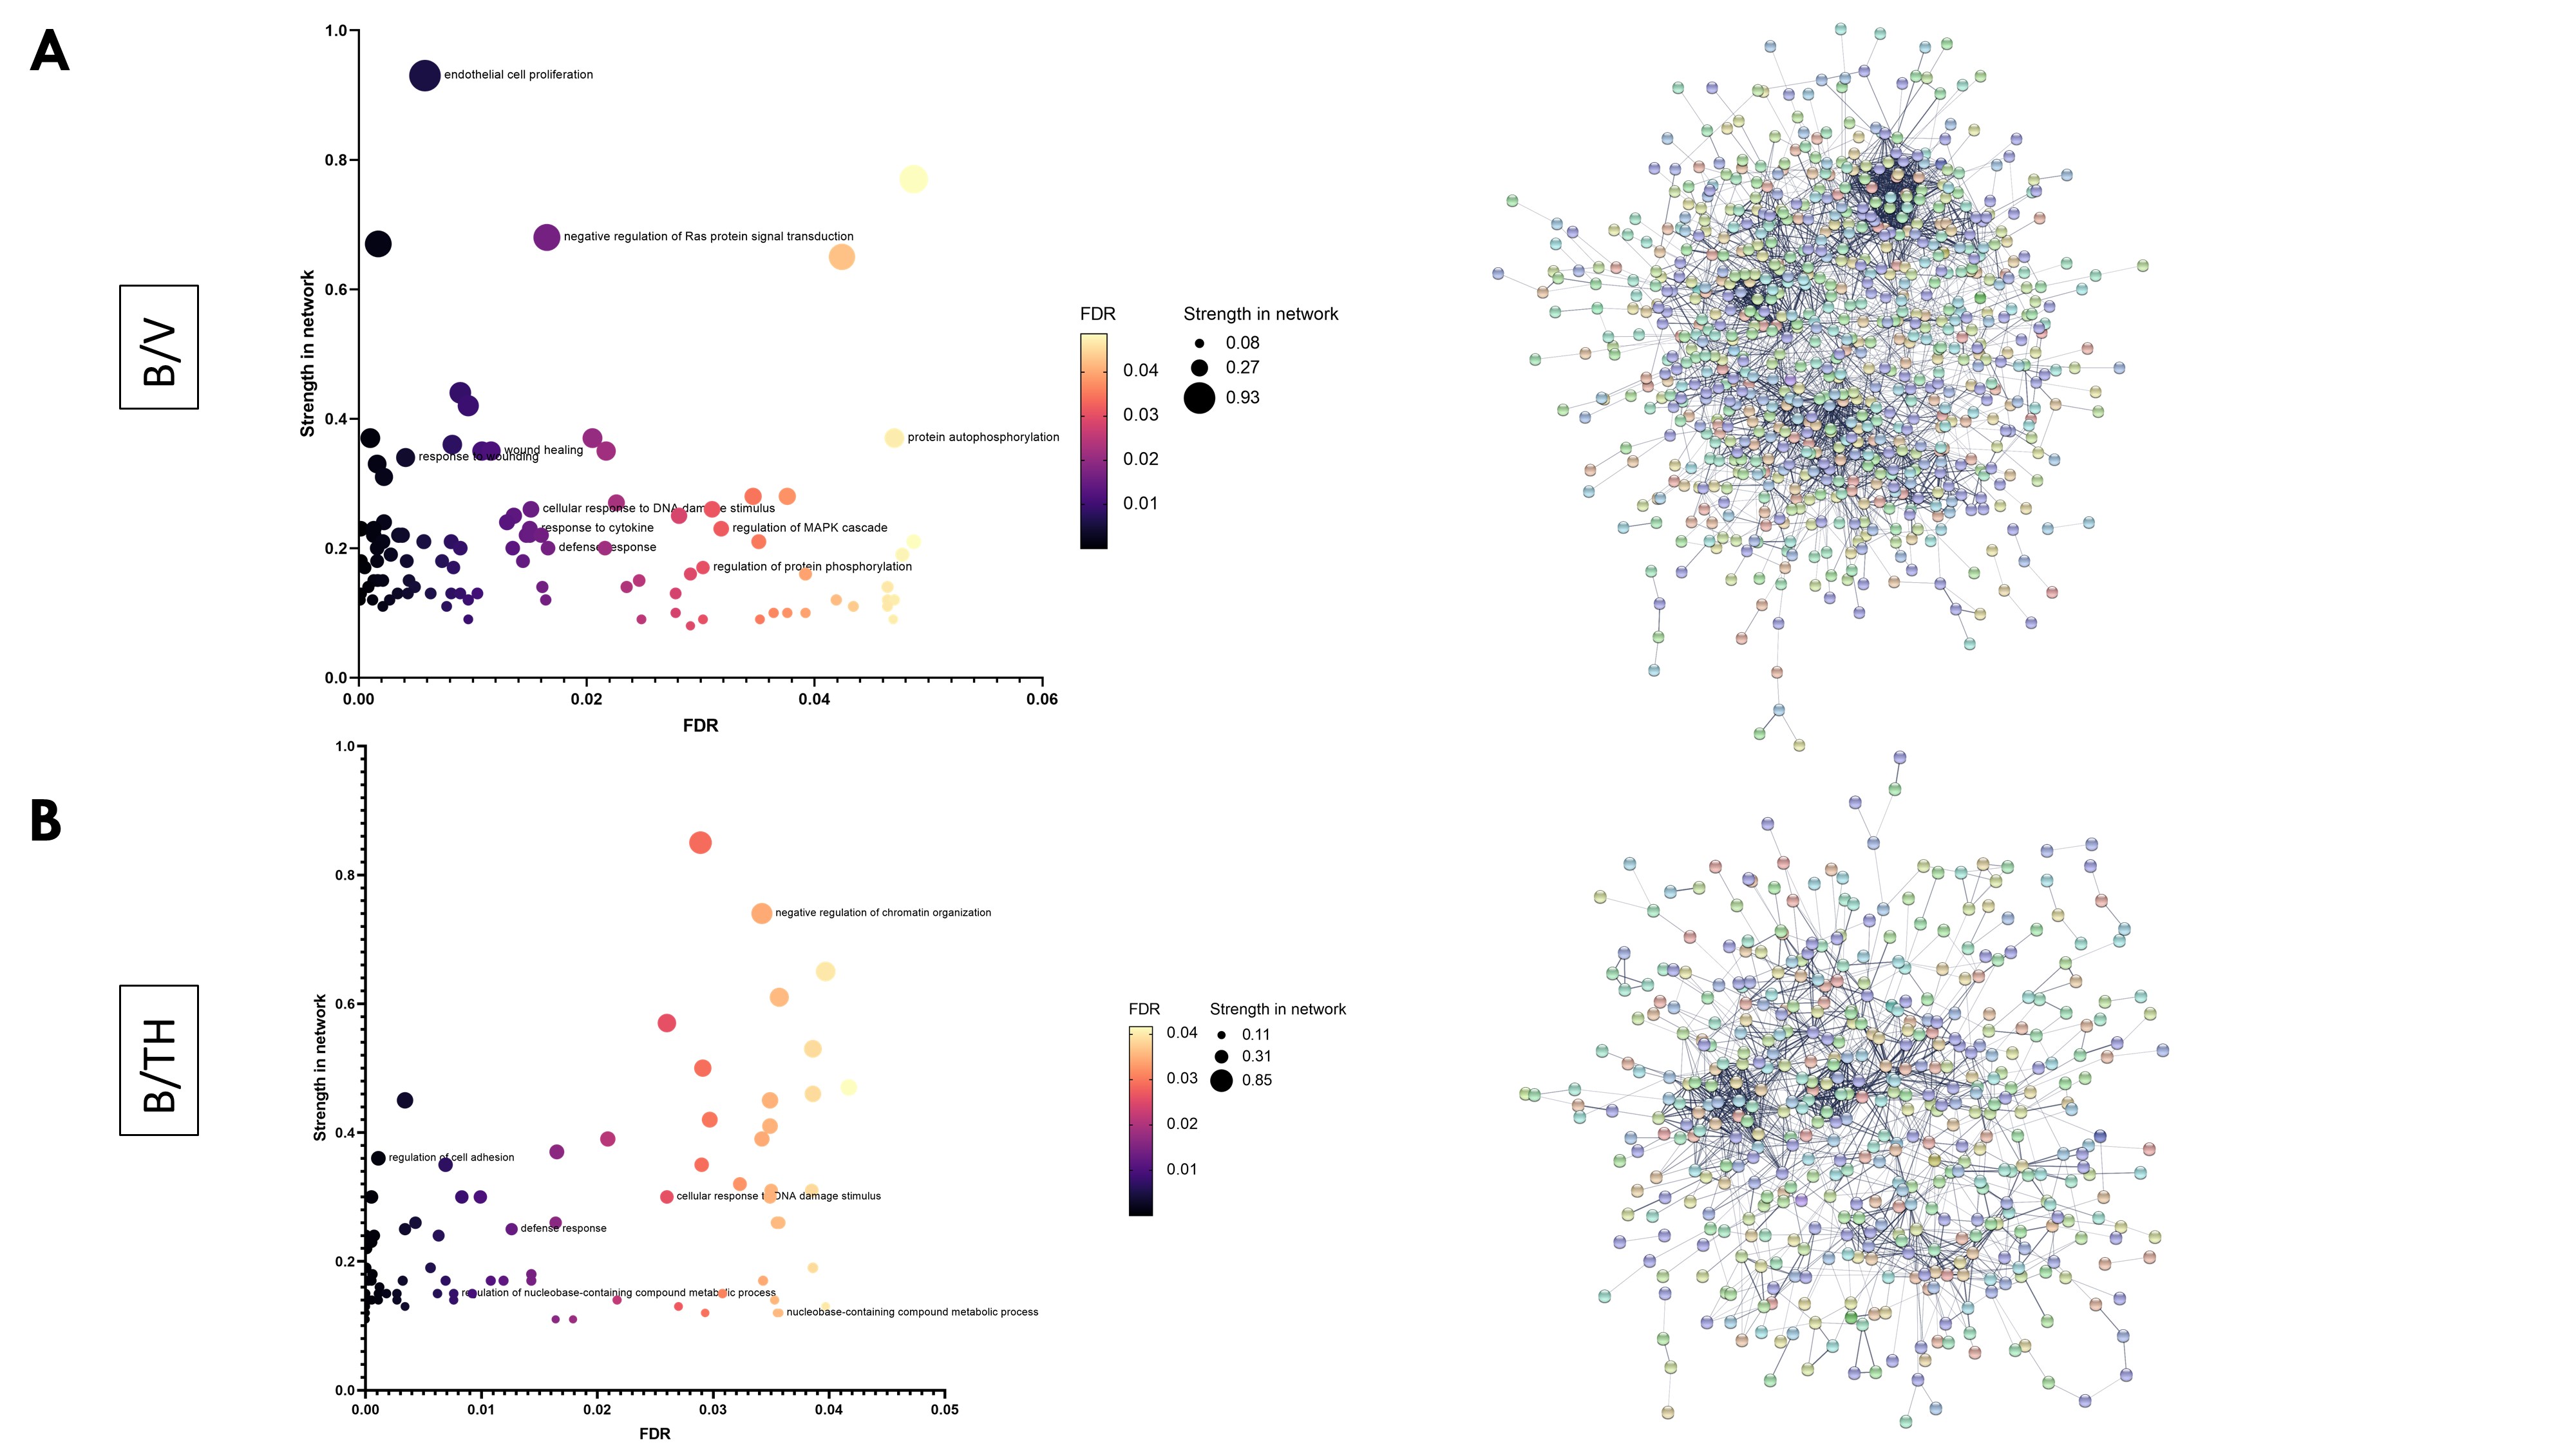


**Supplementary Figure 12: STRINGDB GO terms from lung homogenate samples.** (A) Bleomycin/vehicle, (B) Bleomycin/TH5487 treatment conditions; false discovery rate (FDR).


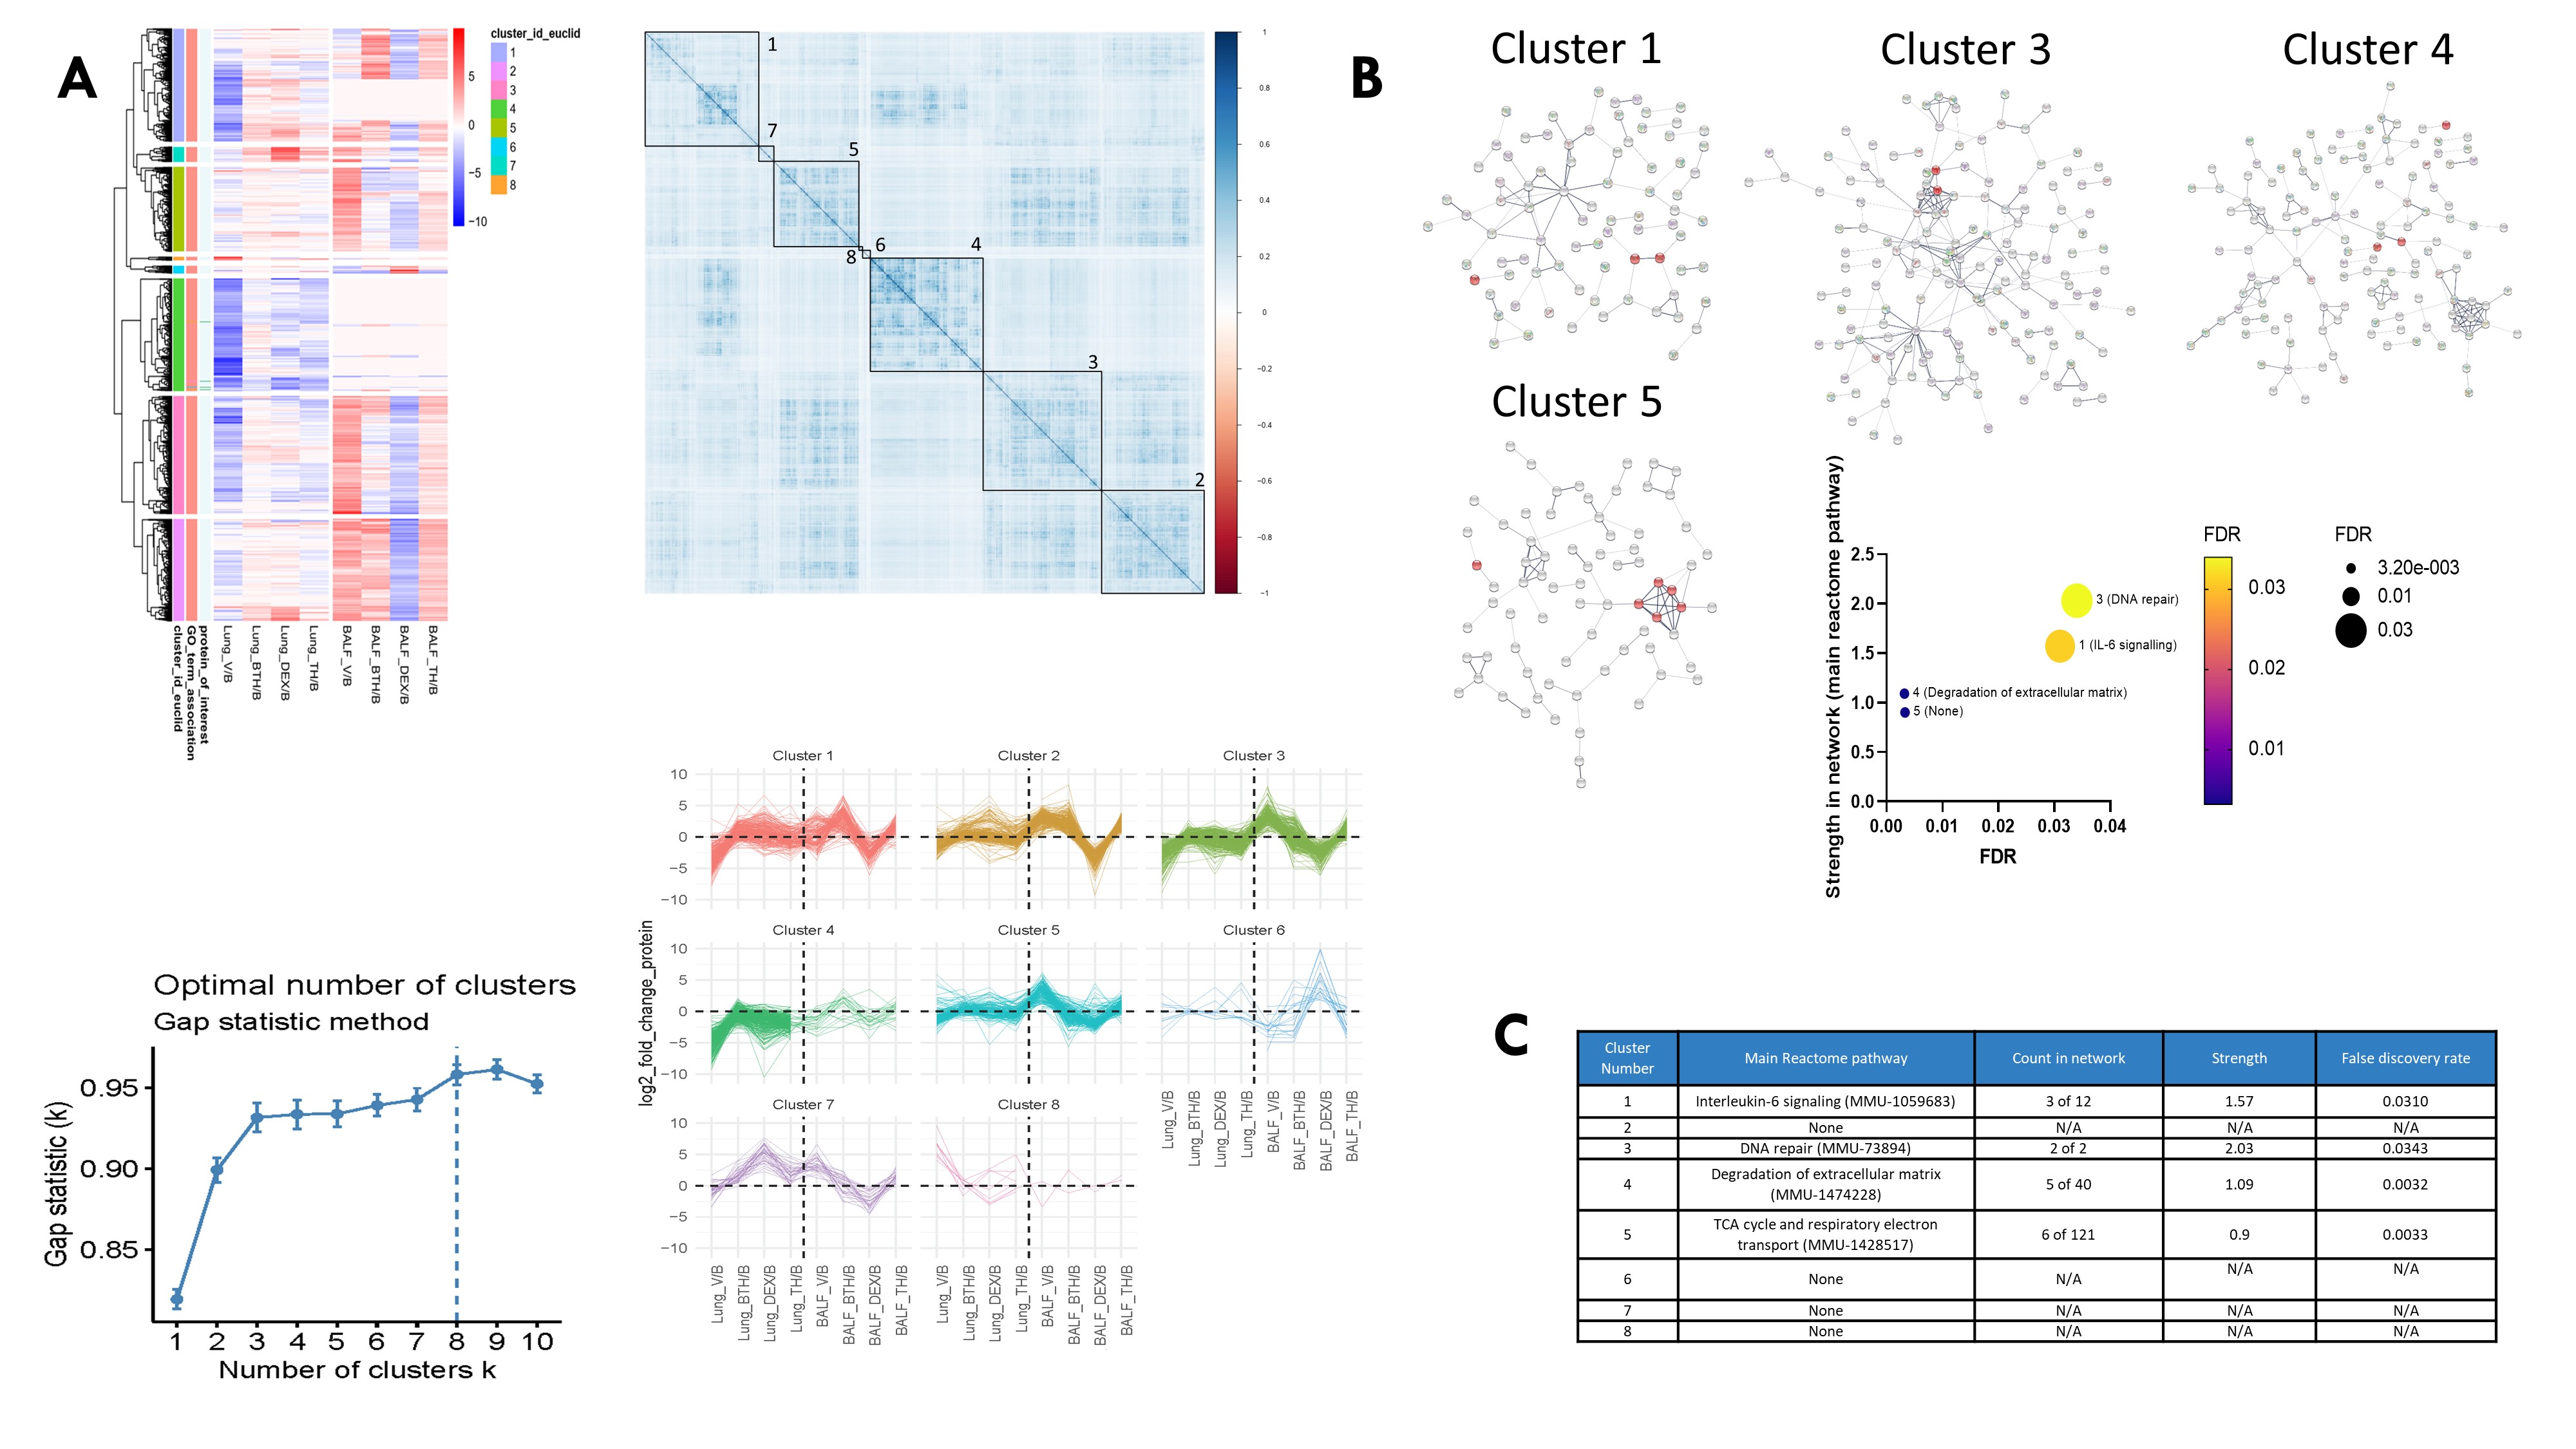


**Supplementary Figure 13: STRINGDB GO terms from lung homogenate samples analyzed using cluster analysis.**

**
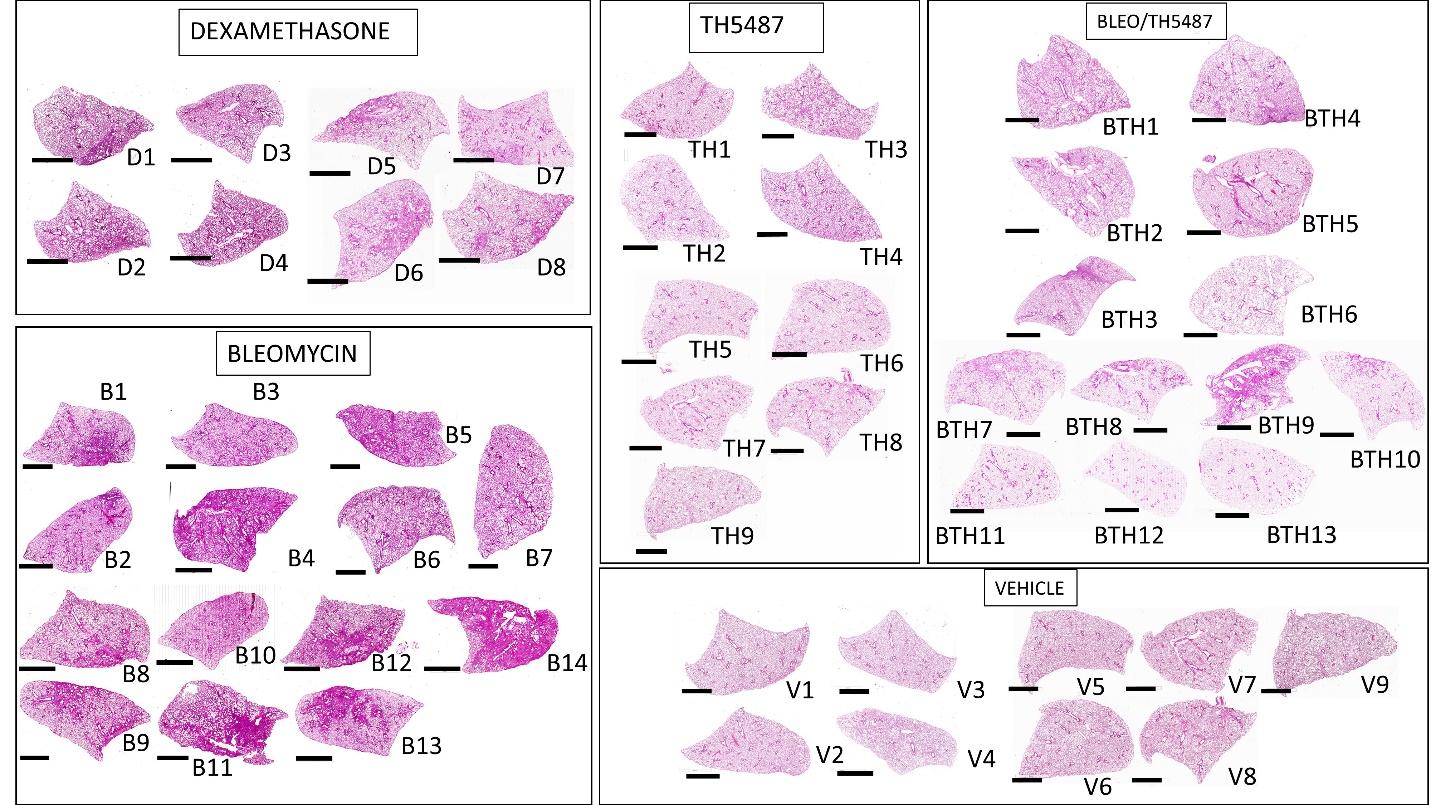
**

**Supplementary Figure 14: Whole lung scans of murine lungs following H&E staining (scale bar=2 mm).**

**
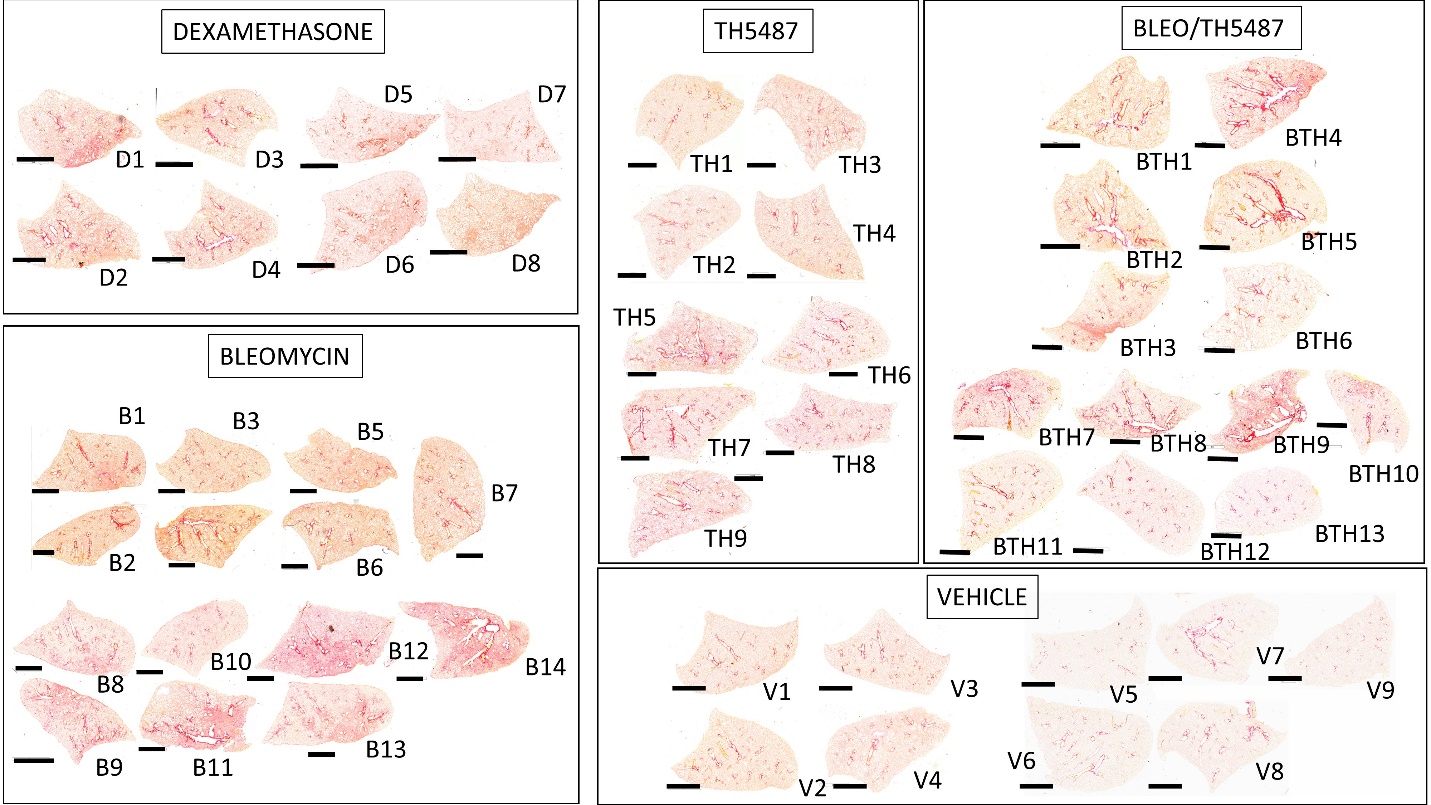
**

**Supplementary Figure 15: Whole lung scans of murine lungs following picrosirius red staining (scale bar=2 mm).**

**
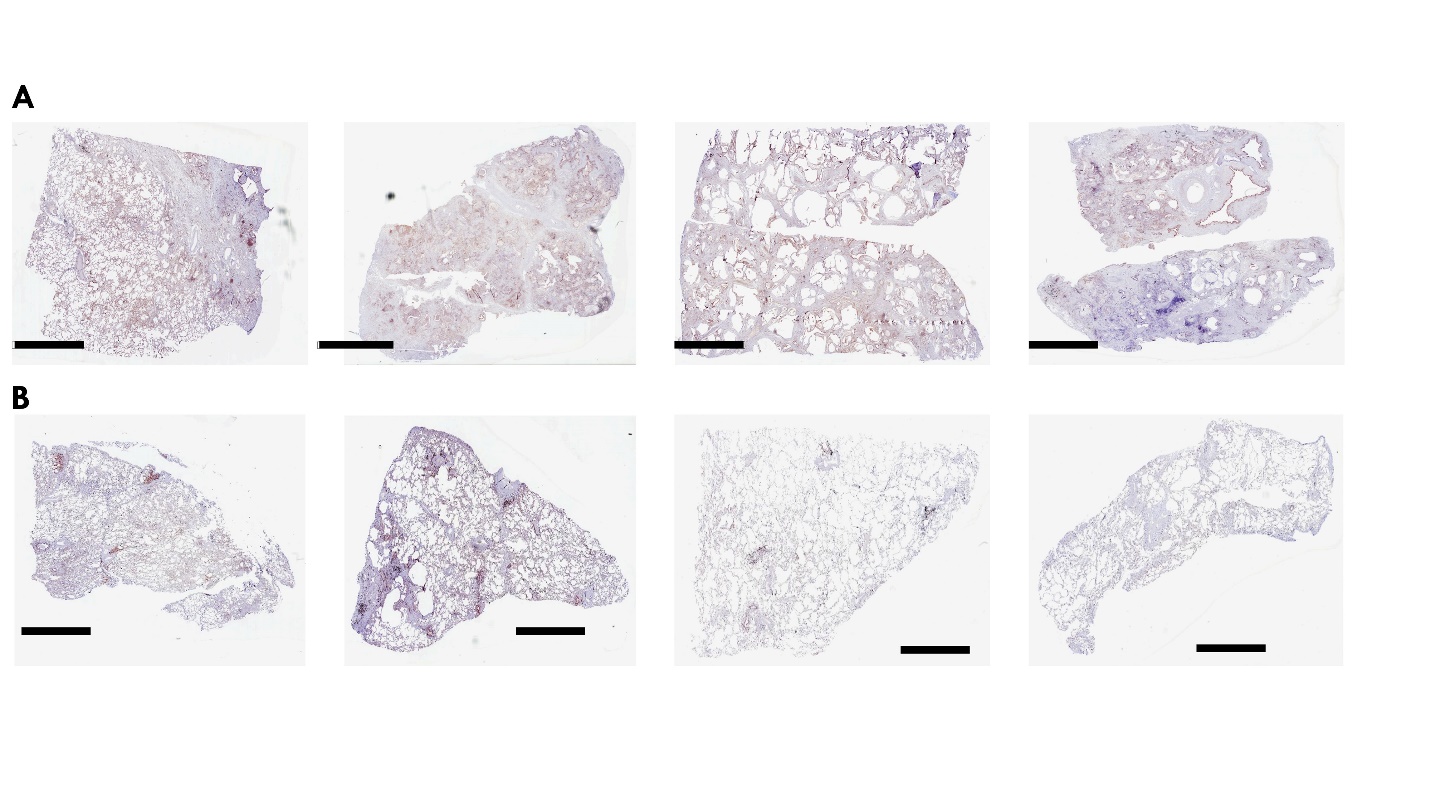
**

**Supplementary Figure 16: Lung scans of human lung explants following immunostaining for OGG1 (scale bar=6 mm).**

**
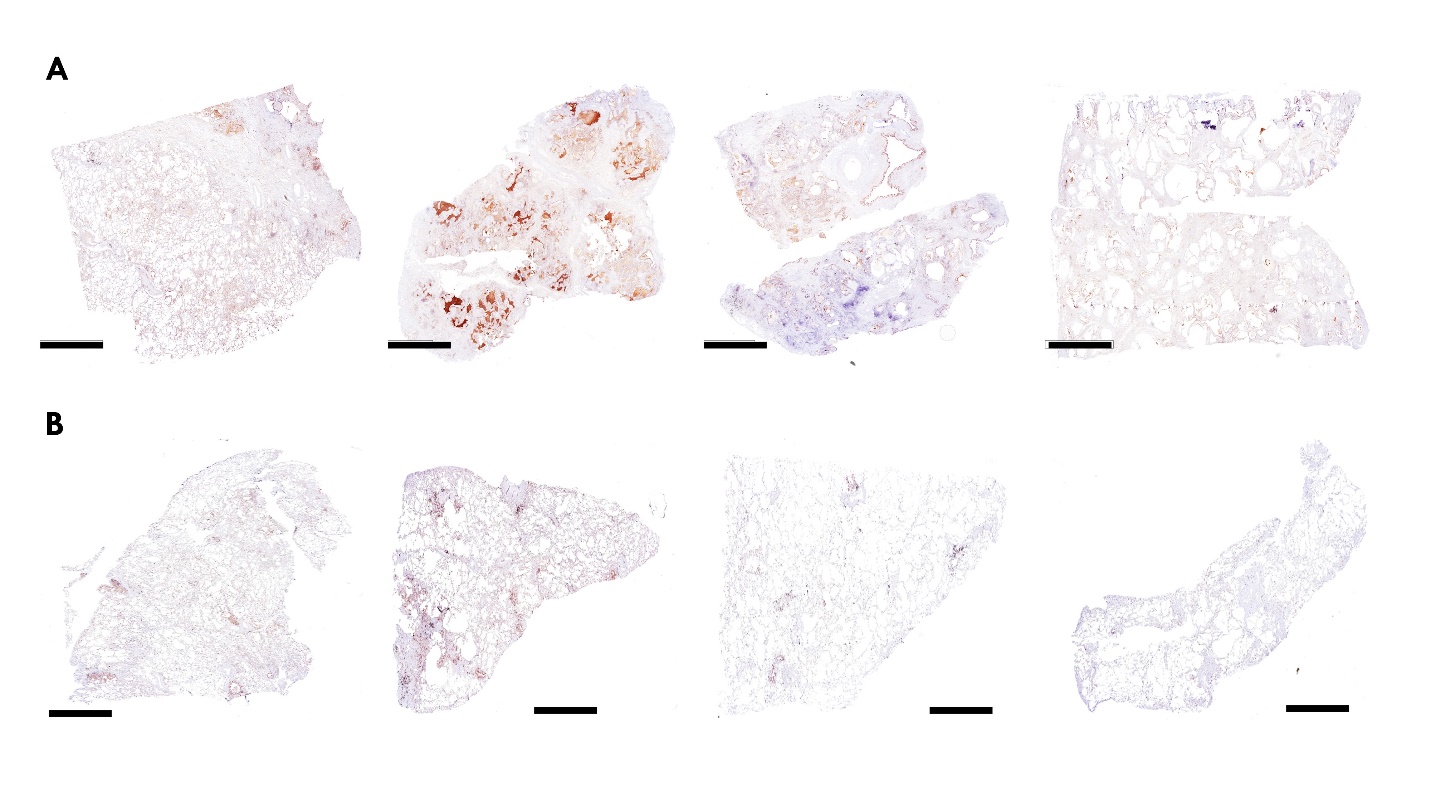
**

**Supplementary Figure 17: Lung scans of human lung explants following immunostaining for SMAD7 (scale bar=6 mm).**
